# Supplementary material for: Rare, protein-truncating variants in ATM, CHEK2 and PALB2, but not XRCC2, are associated with increased breast cancer risks
Source: PubMed Central journal article supplement (PMC5740532; doi:10.1136/jmedgenet-2017-104588), 2017-08-04
Supplement: jmedgenet-2017-104588supp001.pdf [file jmedgenet-2017-104588supp001.pdf]

**Table S1.** Primer sequences and amplicon details. Partially overlapping amplicons were tiled across the target regions with a maximum amplicon length (forward and reverse primer length plus intervening unique sequence) of 200-bp. Primers were designed with melting temperature range 59.0°-61.0° C. Each primer included an orientation-specific tail sequence for subsequent ligation of adapter and barcode sequences.

| Gene | Chr   | Start     | End       | F-Primer                       | R-Primer                          | F-Primer Length | R-Primer Length | Unique Sequence Length | Total Amplicon Length | GC % |
|------|-------|-----------|-----------|--------------------------------|-----------------------------------|-----------------|-----------------|------------------------|-----------------------|------|
| ATM  | chr11 | 108098316 | 108098513 | TTACAGACAGTGATGTGTCT           | TCAACTTCTTTGAAATAAAAAGGAAATAA     | 23              | 32              | 143                    | 198                   | 32   |
| ATM  | chr11 | 108098462 | 108098632 | GTGTGATAGTAAACCCATTAATTTCTT    | AAATTTGAAATAGAAATACCTAAAACAGCATCC | 30              | 32              | 109                    | 171                   | 30   |
| ATM  | chr11 | 108098508 | 108098694 | AGTTGAGAAATTTAAGCGCTGAT        | ACACACAAAAGTAATACACACAGAA         | 24              | 27              | 136                    | 187                   | 29   |
| ATM  | chr11 | 108099820 | 108100000 | CTTTGTGATGGCATGAACAGCT         | ATCTTTTCTGGCTGGAGGCTTG            | 23              | 23              | 135                    | 181                   | 31   |
| ATM  | chr11 | 108099927 | 108100103 | AAAGAAAACAGAATGCTGAGAAATAGC    | CACGGCAGAGTAATCTGTTAAGC           | 26              | 23              | 128                    | 177                   | 36   |
| ATM  | chr11 | 108106328 | 108106504 | AGTTGCCATTCGAAGTCTTAT          | TGAGTAGATGTGCTACAATCAGC           | 23              | 23              | 129                    | 177                   | 31   |
| ATM  | chr11 | 108106395 | 108106590 | AGGAGCACCTAGGCTAAAATGTC        | ATTCACAAAACACACCTTCAAAC           | 23              | 25              | 148                    | 196                   | 35   |
| ATM  | chr11 | 108114576 | 108114764 | TCCTTTTCTGTATGGGATATGGA        | ACAGATGAATTAATCTAGCCACT           | 25              | 24              | 140                    | 189                   | 26   |
| ATM  | chr11 | 108114683 | 108114870 | TGTTCTCTGTGACTTACGGCTG         | ACAAAAGAAAAAGAGATAGATACCTCG       | 23              | 29              | 136                    | 188                   | 37   |
| ATM  | chr11 | 108114719 | 108114918 | CACAAGATGTTCAATAGAGTTTATGGG    | CTGAGTCTAAAACATGGTCTCG            | 27              | 23              | 150                    | 200                   | 35   |
| ATM  | chr11 | 108114741 | 108114919 | AGTGGCTAGATAAATCATGCTGT        | ACTGAGTCTAAAACATGGTCTCG           | 24              | 24              | 131                    | 179                   | 35   |
| ATM  | chr11 | 108115460 | 108115633 | TGTACAGTTTGTCCCTGGTT           | TGGGAAGAATTTCACTCTCAATTCACA       | 23              | 28              | 123                    | 174                   | 40   |
| ATM  | chr11 | 108115551 | 108115750 | AGCAGCTTCTACTTCTCCCTCA         | TTTCTGGGTTTGGCTCTCTC              | 23              | 23              | 154                    | 200                   | 35   |
| ATM  | chr11 | 108115614 | 108115808 | AGGAGATGAATTTCTCCCACTTT        | ACTTCTATGTTTGAAGAAGAAACAA         | 24              | 26              | 145                    | 195                   | 31   |
| ATM  | chr11 | 108117623 | 108117815 | TTTGTGGAGCTAGCAGTGTAAA         | TTTGACCGCAATATACGAAATCC           | 23              | 24              | 146                    | 193                   | 33   |
| ATM  | chr11 | 108117236 | 108117932 | ATGATCTGCTAGTGAATGAGATAAGT     | TTTAAAGGCCAAAATGCCAGT             | 26              | 23              | 148                    | 197                   | 33   |
| ATM  | chr11 | 108117791 | 108117986 | AGGATTTCTAAATTTGCCGTCAAAG      | AGGAATAGTGTGATGACAGAGTCA          | 26              | 25              | 145                    | 196                   | 34   |
| ATM  | chr11 | 108119559 | 108119753 | GATACGAGATCTGCTGTCC            | TCCTTTTCAAGGGACACTGTAAT           | 21              | 24              | 150                    | 195                   | 36   |
| ATM  | chr11 | 108119688 | 108119880 | AGATTTCAACTTACACTACTACACA      | AACATACAGAGATTAATAATGACACTGAA     | 28              | 29              | 136                    | 193                   | 35   |
| ATM  | chr11 | 108121365 | 108121538 | TTTCTTTAGTTTGTAAATGATGGA       | CCATGCTGCTGGGGTAG                 | 28              | 20              | 126                    | 174                   | 34   |
| ATM  | chr11 | 108121468 | 108121666 | AGTTTACCTAAGTGTGAGCTGGT        | AGGTAATACACAAATTTATCCAGATG        | 24              | 29              | 146                    | 199                   | 40   |
| ATM  | chr11 | 108121552 | 108121722 | TATGTTTACGATGCTTACGGGA         | GGCTCCAGTAAGCCAAAGTTTTC           | 23              | 24              | 124                    | 171                   | 37   |
| ATM  | chr11 | 108121652 | 108121851 | TTTGGTATATACCTTCTGGTT          | TGTGTTCTGGTGTGTTTATCTGTAAGT       | 27              | 27              | 150                    | 200                   | 37   |
| ATM  | chr11 | 108122503 | 108122698 | AGATAAAGCTTTGCCCTCCAA          | AAGAGCAATTCATTTATGATCTCTTT        | 23              | 27              | 146                    | 196                   | 37   |
| ATM  | chr11 | 108122626 | 108122820 | TGGGAATAGAGCAAAAATGTGTGAA      | AGTGGAGAGAGCTGTATAAACA            | 26              | 23              | 146                    | 195                   | 34   |
| ATM  | chr11 | 108123492 | 108123662 | TCCTTACATGGCTTTGGCTTCT         | AAGAGCATATAGATAACATCACTCTG        | 24              | 30              | 117                    | 171                   | 33   |
| ATM  | chr11 | 108123547 | 108123725 | TTTTCTCACTTGTACTGGGAAA         | GATCGACAGACTCCACGCTAAA            | 25              | 23              | 131                    | 177                   | 33   |
| ATM  | chr11 | 108124488 | 108124684 | AGGCAAAGCATAGTACTTGGT          | GAGAAGCCAATCTGGACTGGT             | 23              | 23              | 151                    | 197                   | 35   |
| ATM  | chr11 | 108124529 | 108124727 | ACTTCTTGAAGTGAACACACCA         | CAGAGACACAGCTCAGTGAAT             | 24              | 23              | 152                    | 199                   | 39   |
| ATM  | chr11 | 108124643 | 108124842 | AGAAATGGTATGAAAAGCACCA         | CCCTTATCTCTCTTAACAG               | 24              | 23              | 153                    | 200                   | 38   |
| ATM  | chr11 | 108126837 | 108127036 | GAACCTTTTGTTTTAAATGATGATGATGTT | GCTTCTCTTCAGCTATACACCC            | 36              | 24              | 140                    | 200                   | 31   |
| ATM  | chr11 | 108126940 | 108127114 | AGATTACAATTCGAAACTTGTGCC       | ATTTCAATCAAATTCGAAACTTGTAGT       | 27              | 33              | 115                    | 175                   | 37   |
| ATM  | chr11 | 108128126 | 108128315 | CCAAGATAAAGTCACTGAAAAGCA       | GCAACTGTGATCACTGATCA              | 28              | 23              | 139                    | 193                   | 33   |
| ATM  | chr11 | 108128198 | 108128373 | TTCAACAATGCTCTAATGCAATGTG      | TCCTATCTCAAAAAAACAAGAA            | 26              | 28              | 122                    | 176                   | 35   |
| ATM  | chr11 | 108129666 | 108129837 | TGTTTTTATTCTTTGTTGGTTGTT       | teaaantagATGACAAAACAGGAAGC        | 28              | 27              | 117                    | 172                   | 31   |
| ATM  | chr11 | 108137849 | 108138043 | TGCTCTGCAAGAAGCCAT             | TCGTTTGTACTCACTACTATCA            | 19              | 27              | 149                    | 195                   | 40   |
| ATM  | chr11 | 108137915 | 108138110 | GCCATTTGACCCGTGGAGAATG         | AAAGAAGTAAAGAAATCCCAAGTAGTAAA     | 22              | 30              | 144                    | 196                   | 37   |
| ATM  | chr11 | 108139084 | 108139260 | TATATGGCTGTTGTCCTTCTC          | GCTGCCTAAAGGACACAGTAT             | 23              | 23              | 131                    | 177                   | 37   |
| ATM  | chr11 | 108139135 | 108139327 | AGGTGCCATTAATCTTTAGCTG         | GTTGAGGGATTTGGTAGGTTCT            | 23              | 22              | 148                    | 193                   | 40   |
| ATM  | chr11 | 108139255 | 108139439 | GGCAGCTGATATCGGAGGAAAT         | TCAAATTTCAAAGACACCATGTGA          | 23              | 25              | 137                    | 185                   | 38   |
| ATM  | chr11 | 108141739 | 108141891 | AAAGTAAATGATTTGGGATAAACCTGA    | AAGGTTTTAATTTTACAGTAAGTGGT        | 28              | 28              | 97                     | 153                   | 36   |
| ATM  | chr11 | 108141813 | 108142007 | TTCTGGGAGAGAGTACCCTTG          | TGGTCAAGCAGTAAAGAAACA             | 23              | 23              | 149                    | 195                   | 33   |
| ATM  | chr11 | 108141856 | 108142052 | ACTTCTGAACCACTACTGTAAGAA       | TCTCACAGTAAAGGACATGGTT            | 25              | 23              | 149                    | 197                   | 29   |
| ATM  | chr11 | 108141993 | 108142192 | GTATCGTGTGACCAAGATGTT          | TGCATCTGATCCACAGATAGCA            | 23              | 23              | 154                    | 200                   | 38   |
| ATM  | chr11 | 108143152 | 108143347 | AGCACAGAAAAGACATATGGAAGT       | TGCAAAAACCTCACTCAAGCAAA           | 24              | 23              | 149                    | 196                   | 33   |
| ATM  | chr11 | 108143256 | 108143454 | CAGGCATCTAACAAAGGAGAGGA        | ATCAGCTACGGGAAAAGAACTG            | 23              | 23              | 153                    | 199                   | 32   |
| ATM  | chr11 | 108143380 | 108143553 | AAGCAGTCTTTGTTGTAATGAT         | GCGCAACTTGGTGTGATGTCAG            | 25              | 23              | 126                    | 174                   | 34   |
| ATM  | chr11 | 108143427 | 108143626 | AACCACAGTCTTTCCCGTAGG          | TGCCATCTGCAGCATCCAAATA            | 23              | 23              | 154                    | 200                   | 39   |
| ATM  | chr11 | 108150143 | 108150331 | ATGCTTTGGAAAGTAGGGTTGA         | TCTCTACTTCTTCTGAGCTTT             | 23              | 23              | 143                    | 189                   | 37   |
| ATM  | chr11 | 108150215 | 108150412 | AAAGTTGTTCCAGGACACGAAGG        | CCAACTTGGTGAAGTATTTATGGGA         | 23              | 27              | 148                    | 198                   | 37   |
| ATM  | chr11 | 108151619 | 108151817 | TGTGTATAGCTTGTCAAAAATCTGG      | AGGGCTACAGGATAAAACCCACAG          | 26              | 23              | 150                    | 199                   | 29   |
| ATM  | chr11 | 108151640 | 108151837 | TCTGGAGTTCAGTTGGGATTTAT        | AAAGCTCTTTTCCGACATAGG             | 24              | 23              | 151                    | 198                   | 30   |
| ATM  | chr11 | 108151724 | 108151896 | CCATATGCTGAGAACCTGCGAAA        | CCTTTTACAAAGGTTGAGGTTCTA          | 23              | 23              | 126                    | 173                   | 39   |
| ATM  | chr11 | 108151805 | 108151985 | ATCCTGTAGCCCTATTCGCGAAA        | AGATGCCACTCAGAAAATCTAGC           | 23              | 23              | 135                    | 181                   | 36   |
| ATM  | chr11 | 108153336 | 108153531 | tgatGTTGTTTCTAGGCTCACTC        | AGATTTAGCCATTTCAAACCCAGA          | 25              | 24              | 147                    | 196                   | 29   |
| ATM  | chr11 | 108153425 | 108153622 | TGGTTCGTGCAAGTTTATAGAAA        | TCATGTATAAATCTCAATAAATCTCAAT      | 23              | 23              | 142                    | 193                   | 30   |
| ATM  | chr11 | 108153489 | 108153681 | TGGCATCTCATTTAGATTAICTGG       | GGTGAAGGGGACTGCTAAGTATT           | 25              | 23              | 145                    | 198                   | 28   |
| ATM  | chr11 | 108154946 | 108155121 | ATTTTATAGTCTTTAATAAGGTTTGTATCC | TCTGCTGACCTCATAGGCAAA             | 32              | 23              | 121                    | 176                   | 35   |
| ATM  | chr11 | 108154966 | 108155165 | GGTTTTGATCCACATCTGGTGA         | CATAGACCTTGGTAGCAGTCTCTC          | 23              | 24              | 153                    | 200                   | 41   |
| ATM  | chr11 | 108155026 | 108155211 | TCAGATTCAAGAGGACTGAAAAGT       | TGAAGCATTACTCTGTTTCCCAA           | 25              | 23              | 138                    | 186                   | 40   |
| ATM  | chr11 | 108155137 | 108155333 | GCAAAGAGAGACTGCTACCAAGG        | TGCTAGATAATGATTACCAAGCTAAGT       | 23              | 29              | 145                    | 197                   | 30   |
| ATM  | chr11 | 108158251 | 108158445 | AAATATAGCTTTTGGAGTCTCTTG       | TACCTGAAAAGTCCACAGAGGTC           | 25              | 23              | 147                    | 195                   | 35   |
| ATM  | chr11 | 108158316 | 108158499 | TGCCCTTGCAGATGATCACTTA         | ACTTCTTTAAAACCTTGTGAAGTTAGAGC     | 23              | 29              | 132                    | 184                   | 38   |
| ATM  | chr11 | 108159628 | 108159799 | TCATTTTGAAGATTCACCTGGTCA       | TTTAACTTGGTTTATGACAAATGCTG        | 24              | 27              | 121                    | 172                   | 34   |
| ATM  | chr11 | 108159697 | 108159875 | CTGTAGGGATTTGGATCTGCT          | AAAAAGGAAGGATGTTCTATTAATAACTCA    | 24              | 34              | 122                    | 179                   | 33   |
| ATM  | chr11 | 108160276 | 108160447 | TGTAGCCAGTATCAATTAACAAGT       | TCCTTCAGTAAATAACAACAAGGAT         | 27              | 29              | 116                    | 172                   | 28   |
| ATM  | chr11 | 108160360 | 108160539 | GTGAGCAAGCAGCTGAAACAAAT        | ATGTTATTTACTTGGTTGATATAGTGAAT     | 23              | 32              | 126                    | 180                   | 32   |
| ATM  | chr11 | 108160418 | 108160588 | TCACCTGTTGTTAGTTTATTAAGTAAAG   | aaAAACAGGAAGAACAGGATAGAAAAG       | 29              | 27              | 115                    | 171                   | 33   |
| ATM  | chr11 | 108163250 | 108163437 | AGAGATGCTGACAAAAGGACTTTC       | TACAGTAAAGTCCAGCTGCTGG            | 24              | 27              | 141                    | 188                   | 37   |
| ATM  | chr11 | 108163372 | 108163553 | TACGTAGTCTTCCCTTTGTGTT         | AAATACCATTTTGAAGATGAGTCAGAAA      | 23              | 28              | 131                    | 182                   | 40   |
| ATM  | chr11 | 108163979 | 108164165 | TGTTGGTCTACTTAAAAATTTCTCTCT    | TGTCTGAGTAAATGCGAAAATCT           | 30              | 23              | 134                    | 187                   | 28   |
| ATM  | chr11 | 108164114 | 108164284 | AGATCTCTTCTGACCATGTTGTT        | ACTGTAGAGCATACAGATTTTGA           | 25              | 26              | 120                    | 171                   | 32   |
| ATM  | chr11 | 108165598 | 108165782 | TATTTCAAGCTGTAACCAATAGC        | AGAAGCTCTCAATATGCTCCACA           | 25              | 23              | 137                    | 185                   | 35   |
| ATM  | chr11 | 108165662 | 108165833 | CCATTTTCTCAGAGTATGTTATGATGC    | TCAA AAAAGAAACAGTGAATAAGCC        | 30              | 26              | 116                    | 172                   | 38   |
| ATM  | chr11 | 108167958 | 108168157 | AAACAAGGTTGTCTTCAATGCT         | TGATCGCAGTGTACTGAAA               | 23              | 20              | 157                    | 200                   | 36   |
| ATM  | chr11 | 108170338 | 108170537 | TGAAGTACAGAAAACAGCATTAAGT      | TAAAGGCCCTGGTAAAGATGC             | 23              | 23              | 149                    | 200                   | 34   |
| ATM  | chr11 | 108170456 | 108170645 | GCTTGGGAGAAGTGGGTCTAT          | GAGATTACATAAAGTATCAATAATACTACA    | 22              | 35              | 133                    | 190                   | 37   |
| ATM  | chr11 | 108170556 | 108170731 | ACTTCAGTGGACTCAATATGCT         | AGACACTGAGATTTAAA AAAAGGACAAA     | 24              | 27              | 125                    | 176                   | 34   |
| ATM  | chr11 | 108172289 | 108172487 | AGTTTGAATTTTTCAGTGGAGT         | GATAGCCAGCATGGAATCTGTT            | 26              | 23              | 150                    | 199                   | 35   |
| ATM  | chr11 | 108172386 | 108172571 | GATCAGCAGCTGTACTTGGTTG         | ACAGAACTTTTATGATGCTGGT            | 26              | 23              | 137                    | 186                   | 35   |
| ATM  | chr11 | 108173515 | 108173710 | TGTGTAGGAAAGGTACAATGATTTCCA    | CCACTGCCAAA AAAAGCACAAAT          | 27              | 23              | 146                    | 196                   | 35   |
| ATM  | chr11 | 108173609 | 108173802 | AAACCTTTTGAAGGCTGGATG          | ACAGGTCAATAAACAAGGATTAATACAGC     | 33              | 30              | 141                    | 194                   | 34   |
| ATM  | chr11 | 108175309 | 108175508 | ATATGCAACGGGGCATGAAAT          | CCCTGAACATGTGTAGAAAAGCAG          | 23              | 23              | 154                    | 200                   | 31   |
| ATM  | chr11 | 108175408 | 108175579 | ACTGACTTTTGTACAGACTTCTC        | CTGATCTTGTGCTGAGGCTG              | 25              | 23              | 124                    | 172                   | 41   |
| ATM  | chr11 | 108175504 | 108175674 | CAGGATTTTTCACAGCTGTCT          | AATCTGTAAAGTCTTTTATGGGA           | 23              | 26              | 122                    | 171                   | 39   |
| ATM  | chr11 | 108178569 | 108178745 | GAAAGTGTGTAAGCAAGAAATGCC       | TCCTAAAACCTGAAAGCAACTCA           | 23              | 25              | 129                    | 177                   | 40   |
| ATM  | chr11 | 108180792 | 108180991 | AAGCAGTCACTACATGATTTCTA        | AGTAAAGCTGTAAGGTGAGCAGCA          | 25              | 24              | 151                    | 200                   | 32   |
| ATM  | chr11 | 108180910 | 108181102 | ATGATGCTTTCTGGCTGGATTA         | ACCTTATGAGCAAAATGCCAC             | 23              | 24              | 147                    | 193                   | 34   |
| ATM  | chr11 | 108183082 | 108183269 | TCAGGAGCTCCAAAATGATGTTCT       | ATGAGATAAATCTGTATAAATAAGAGCC      | 26              | 32              | 130                    | 188                   | 32   |
| ATM  | chr11 | 108186449 | 108186630 | AGTTGGGAGTACATATGGTAATGA       | GGGTTGATCACTTCCCTCCAC             | 26              | 23              | 133                    | 182                   | 35   |
| ATM  | chr11 | 108186584 | 108186775 | AGCCAGATAGTTGTATGGCTGT         | CTTTGCCCCACATGCTCTCG              | 23              | 20              | 149                    | 192                   | 37   |
| ATM  | chr11 | 108186693 | 108186863 | TGTGTGTGTA AAAACCCAAAGCTA      |                                   |                 |                 |                        |                       |      |

|       |       |           |           |                               |                              |    |    |     |     |
|-------|-------|-----------|-----------|-------------------------------|------------------------------|----|----|-----|-----|
| ATM   | chr11 | 108196144 | 108196316 | GCACAGTCAITTTGGAGATCTGT       | AGGAAAGTCAAGAGGTAAGATGAC     | 23 | 24 | 126 | 173 |
| ATM   | chr11 | 108196740 | 108196939 | ATCAGTAGTAAAGTATTATCCCATATGTC | GCATCCAACCTTGTGATCAITTTGCT   | 22 | 25 | 143 | 200 |
| ATM   | chr11 | 108196815 | 108196990 | CAGTACAATTCAGTACGTGTGGAG      | ACAGTAAAACACTAATCCAGCCAA     | 25 | 24 | 127 | 176 |
| ATM   | chr11 | 108198316 | 108198507 | GTTGGGTACAGTCATGATGATGC       | AGGGTGTCCAAAATCTTACCT        | 23 | 24 | 145 | 192 |
| ATM   | chr11 | 108198368 | 108198557 | ACAGAACATCCACAGCTAAATCT       | ATTGATCTTGATGAAAAGATGAAGCA   | 24 | 26 | 140 | 190 |
| ATM   | chr11 | 108199673 | 108199848 | ACCTTAATTTGAGTATTCTTGAATGAT   | TGATATCTGAAAACCCGGGCTAA      | 31 | 23 | 122 | 176 |
| ATM   | chr11 | 108199730 | 108199910 | GGTTGTGTTTTCTTGAAGGCAGTAG     | TCAGGAGAGCTGCTGTGTTTCA       | 25 | 23 | 133 | 181 |
| ATM   | chr11 | 108199828 | 108200004 | AGCCCGTTTTTCAGATATCAAT        | TGGTGAACATAAAATGTCACTGTGAGAA | 23 | 30 | 124 | 37  |
| ATM   | chr11 | 108200875 | 108201072 | TGTTGTGATTTGTAGTCTGTAAAGTTC   | TGTTCTTCCACTTAATAAAGCAAT     | 29 | 26 | 143 | 193 |
| ATM   | chr11 | 108200990 | 108201182 | CGTGCACTGAAAAGGAGGTGATA       | CACAGGATGAGATAATTTGGGCTGA    | 23 | 23 | 147 | 36  |
| ATM   | chr11 | 108202126 | 108202312 | TGAAAATCCTTGTCTTAAATTTGTGTC   | ttGGTGTGATTTTCAGGTTTACT      | 29 | 25 | 133 | 187 |
| ATM   | chr11 | 108202479 | 108202677 | CAGGCATACCGCTCACCC            | GTTTGCATTTGCTAAGGCCAGT       | 20 | 22 | 157 | 35  |
| ATM   | chr11 | 108202628 | 108202810 | ATCACCCCAATCACACTTGT          | ACTGAATACACACTTAAAAGGTAAG    | 23 | 28 | 132 | 183 |
| ATM   | chr11 | 108203392 | 108203580 | TGTGCAATAAATCTGTTTTCTTTGTT    | TAAGCATCAAAAAGGCTCAAC        | 30 | 23 | 136 | 189 |
| ATM   | chr11 | 108203491 | 108203679 | TCGAACAGAGGCTGCAAAATGAA       | ACAGAGATTAACACAGCAAGAAAGT    | 23 | 25 | 141 | 189 |
| ATM   | chr11 | 108204495 | 108204691 | GAGCCTGAAACACAGATGACAA        | ATTTCCATAGTAGGAGCAACAA       | 23 | 24 | 150 | 197 |
| ATM   | chr11 | 108204623 | 108204802 | TATTCAGACAGACCACCAATTA        | TGCCAAATTTAAACCAATTTGACCT    | 23 | 26 | 131 | 180 |
| ATM   | chr11 | 108205618 | 108205812 | TGCCAATTAATAATTTTCTTAAAGTGC   | GCCATCGGAACTACACAACTA        | 31 | 23 | 195 | 23  |
| ATM   | chr11 | 108205689 | 108205874 | TTAATAGGTGGACACACAGGAG        | AAAACCTTAAGGGCTAAGCCAGA      | 23 | 23 | 146 | 186 |
| ATM   | chr11 | 108206475 | 108206666 | CAGATTGGTTTGGAGTGCCTTTG       | TTCTCTTCTAGTTTCCGTGTT        | 23 | 23 | 140 | 192 |
| ATM   | chr11 | 108206559 | 108206750 | AATTAATCGAAGGGCCGTGATG        | caaccacacAAATGGCATCTTTA      | 23 | 24 | 145 | 192 |
| ATM   | chr11 | 108213864 | 108214058 | TTGCACTGACTGTGATGCTGAA        | GGCTGTGATCTTTTATGAGCACCA     | 23 | 41 | 148 | 38  |
| ATM   | chr11 | 108213975 | 108214162 | TGTTCTTGAATGGTGCACAGGA        | GCTGTACAGTCTTAATAAGCCAT      | 23 | 23 | 145 | 188 |
| ATM   | chr11 | 108216364 | 108216557 | TCATCTTATTTGCCCTATATCTGTC     | TGCAGAAGTAACCGGAAAACCTGGT    | 26 | 23 | 143 | 26  |
| ATM   | chr11 | 108216503 | 108216680 | GAAGTCTTCATGGATGTTGGCC        | CCAAAACAACAAAGTGTCTAATCT     | 22 | 23 | 133 | 178 |
| ATM   | chr11 | 108217970 | 108218167 | CAGTGATTTTCAGATGTTGTTCTTTT    | CAATGATGTTGTTGTTGTTCTTTT     | 29 | 23 | 146 | 198 |
| ATM   | chr11 | 108224395 | 108224580 | AACATGTTGTTCTTGCCTTTG         | ATGGCCATGCCATCCACAATCA       | 23 | 23 | 140 | 186 |
| ATM   | chr11 | 108224489 | 108224668 | TTAAGTGTGTTTGAACAGGG          | ATGGCCATGCCATCCACAATCA       | 23 | 22 | 135 | 180 |
| ATM   | chr11 | 108225438 | 108225608 | GCATAGGCTCAGCATACACCA         | gcccagcCAGTGAATTTGAC         | 23 | 26 | 122 | 171 |
| ATM   | chr11 | 108225539 | 108225720 | TCTGTGAGCAAAAACAGTGAAGT       | ACTTTACTCTCAATGGTTAAACA      | 23 | 22 | 132 | 182 |
| ATM   | chr11 | 108225716 | 108225915 | ACTGGCTTATTTGATGATACGTGTC     | CCAGCCACATCCCTCATGTA         | 23 | 22 | 137 | 182 |
| ATM   | chr11 | 108235828 | 108236007 | TCTTGACTGGACCAATGATCTT        | GCATTCAGAGTGGTGAAGCTC        | 27 | 23 | 150 | 200 |
| ATM   | chr11 | 108235968 | 108236167 | CCGTTGTGACGTTTTCAGATTTCT      | AGCCCTGGGATAAGAAAATCT        | 24 | 24 | 132 | 180 |
| ATM   | chr11 | 108236070 | 108236269 | CAACAAGTAGCTGAACTGTCAT        | GCAAAATGTGTCACCAACA          | 27 | 23 | 150 | 200 |
| CHEK2 | chr22 | 29083764  | 29083961  | TGACTGTGAAAAGAACAATTTGCCATA   | AGGCTGAAATGAAAGGTAATTCATA    | 24 | 25 | 151 | 200 |
| CHEK2 | chr22 | 29083884  | 29084080  | TTCAACAACAGCAGCACACT          | GAAGAGGCCCCCTGAAG            | 28 | 18 | 152 | 198 |
| CHEK2 | chr22 | 29085056  | 29085244  | TCATCACTTGTCTATCACCTCT        | ACATCAACATGCCCCCTTACT        | 22 | 23 | 152 | 197 |
| CHEK2 | chr22 | 29089944  | 29090135  | TCATCACTTGTCTATCACCTCT        | TCATCAGACACAGTCTATG          | 25 | 23 | 141 | 189 |
| CHEK2 | chr22 | 29091010  | 29091198  | ACAGAATTGACAGGAGAAAACCA       | TCATCTGATTTGCCAATTTG         | 23 | 23 | 146 | 192 |
| CHEK2 | chr22 | 29091109  | 29091283  | TCATCACTTGTCTATCACCTCT        | GGACTCAAGTCTGATGAAGGAT       | 25 | 23 | 141 | 189 |
| CHEK2 | chr22 | 29091641  | 29091818  | TGFGACTTCACTAATCACCTCT        | CCACTGAGAATGCCACTTGAT        | 25 | 23 | 127 | 175 |
| CHEK2 | chr22 | 29091714  | 29091901  | CTTCAAACTCCAGCAGTCCAC         | TCATGAGAACCTTATGTGGAACC      | 24 | 23 | 131 | 178 |
| CHEK2 | chr22 | 29092834  | 29093019  | AGTTTCTGAAACAATCAACAGGA       | TGGCAGTCAACATTAATCCCT        | 22 | 23 | 143 | 188 |
| CHEK2 | chr22 | 29095758  | 29095954  | TGCCTAATTCAGGGAGTAACTCAAC     | ATCTCACTGATCAATCTGAGGCT      | 25 | 23 | 138 | 186 |
| CHEK2 | chr22 | 29099400  | 29099584  | CAGGATGAGAAAAGCAGCTAC         | GAACCCCTGGCTTGCCTT           | 25 | 20 | 152 | 197 |
| CHEK2 | chr22 | 29105921  | 29106700  | ACTGAAAGGCTTATACTTCTCAAT      | ACTTCCCTTTTTTCCCTCC          | 23 | 23 | 139 | 185 |
| CHEK2 | chr22 | 29105986  | 29106135  | ATACTACATGATTAGCTTTTTCAAAATTT | CTCTGTTATCTTGTATCAAAAGGCC    | 29 | 28 | 93  | 150 |
| CHEK2 | chr22 | 29107772  | 29107951  | ACTCAAAAATTCATCACTTAAGCA      | CTTGAGTCAACTGAGTTTAAATGTTTT  | 36 | 24 | 80  | 150 |
| CHEK2 | chr22 | 29107872  | 29108071  | TGATCAGCTTTTATTTGGTACTACT     | AGCCATAAAGATCATCAGCAAAAAG    | 25 | 25 | 130 | 180 |
| CHEK2 | chr22 | 29115310  | 29115504  | CAGAAATGAGAAAACCACTACACA      | CCAGGAGTGGTAGGCTCATATA       | 22 | 21 | 151 | 200 |
| CHEK2 | chr22 | 29120878  | 29121073  | ACCATATCTGTAAGGACAGACAAA      | TGAAACCCATTTTACTCTTTCTCT     | 25 | 26 | 144 | 195 |
| CHEK2 | chr22 | 29120969  | 29121145  | ATTTCTGTTAGTGCACAGTCAAA       | GATCAGACTGGCAATGGAACTT       | 26 | 34 | 147 | 36  |
| CHEK2 | chr22 | 29121130  | 29121325  | TTGTTTCAGACTTTGAAATAGCAGAG    | TCAAAAGTCTGAAAACAAATGTTCT    | 23 | 28 | 126 | 177 |
| CHEK2 | chr22 | 29121185  | 29121384  | GACCAAAATACCAGCTTCCCT         | GGGCAAAAAGCTGTGAAATGCT       | 25 | 24 | 147 | 196 |
| CHEK2 | chr22 | 29130301  | 29130491  | AACTCCAATCAGAACCTTCCACC       | GGCCCTGTGATGATGTTT           | 21 | 22 | 157 | 200 |
| CHEK2 | chr22 | 29130405  | 29130587  | CCATCTGAAGGGCCCAATACT         | TATTCCTGGAGGACCAAGAACCTG     | 23 | 22 | 145 | 191 |
| CHEK2 | chr22 | 29130478  | 29130650  | ggctccaggAATAGAAATGAGTTC      | CTTCAACAGCAGATGCCAAA         | 22 | 21 | 140 | 183 |
| CHEK2 | chr22 | 29130506  | 29130690  | AGTGGCACTGTCTAAGGAGC          | GCCCATGGCAGCGTTA             | 25 | 17 | 131 | 173 |
| CHEK2 | chr22 | 29130550  | 29130749  | GAGAGGACTGGCTGGAGTTTG         | TTGAGGCTCAGCAGTCTCATGG       | 23 | 23 | 140 | 185 |
| PALB2 | chr16 | 23614718  | 23614903  | ACTCCAAAAATCAAGAGGCCAAA       | ACTCACCTTTGTTGGACACT         | 21 | 23 | 156 | 200 |
| PALB2 | chr16 | 23614813  | 23614984  | TTTTTTGTCAGCCAGCAAAATGAG      | GTGACTGCCCTCCCTCCA           | 26 | 19 | 141 | 186 |
| PALB2 | chr16 | 23614918  | 23615095  | GTCCCAAATGGCAATTTGTCAG        | GGAAAGGTGACGAAAGATCACT       | 23 | 23 | 126 | 177 |
| PALB2 | chr16 | 23619121  | 23619297  | TTTTTTGTTTGCACAGTCCCTTT       | TTTGTCTCTGTTGGGTTTTG         | 23 | 23 | 132 | 178 |
| PALB2 | chr16 | 23619192  | 23619382  | CCTGCCCTGGAGGAGACAC           | AAAGAGACTGAGCTGTGCGAAG       | 23 | 23 | 131 | 177 |
| PALB2 | chr16 | 23625270  | 23625462  | CACTTAATGAGACCAACAGTAACAC     | ACATACTTTGACAGTCTAATGGGA     | 19 | 26 | 146 | 191 |
| PALB2 | chr16 | 23625298  | 23625497  | TTAATCTCACAACAACCTGTAATAAT    | ACTGTTTGTGGAAGAAATGTA        | 25 | 23 | 145 | 193 |
| PALB2 | chr16 | 23626256  | 23626447  | AACTGAGGACCTAGAGGGAAGC        | GCAAAGAAAACCAATTTTATGATCC    | 23 | 25 | 148 | 200 |
| PALB2 | chr16 | 23634201  | 23634397  | ACGAGATCTCAATTAACCAACTT       | ACTAGAGACTGTTTATGTCAA        | 27 | 23 | 153 | 199 |
| PALB2 | chr16 | 23634333  | 23634503  | AAAGGTTCCACTGCTACTAAT         | TGAAAATATAAAGCTGTGCTGGC      | 24 | 28 | 148 | 197 |
| PALB2 | chr16 | 23635275  | 23635447  | AGCTGACAGAGCAAAAGATGAAGG      | TATTAAGAAGTTACTCTCATCACCC    | 23 | 28 | 120 | 171 |
| PALB2 | chr16 | 23637478  | 23637667  | CCAATTTGGTAAAGCTGCCCTT        | AGCAATTTTGGCTGCTTTGTT        | 25 | 25 | 124 | 173 |
| PALB2 | chr16 | 23637543  | 23637741  | AGATCCCACTTACCTCTGCGAA        | CGGTTGTGAAAAGGCCAATGAT       | 23 | 23 | 144 | 190 |
| PALB2 | chr16 | 23637669  | 23637839  | CTTCCCAAACATGGCACTCAC         | CAGAACTGTGCCATTTGTTCAG       | 23 | 23 | 153 | 199 |
| PALB2 | chr16 | 23640434  | 23640632  | AGAACAAGAAGCTAATGACTGAATCTT   | AAGACTTAAATTTTACACTACTGTTCA  | 23 | 31 | 117 | 171 |
| PALB2 | chr16 | 23640891  | 23641085  | TCATGCTGTTTACATCTACTAAGGC     | AAGTGTAGACTAATGATGTACTTTG    | 29 | 27 | 143 | 199 |
| PALB2 | chr16 | 23640986  | 23641180  | TCTGGCATGTGTTTCTACAGAG        | ACACTACCTGTGACTGTGACTCT      | 25 | 23 | 147 | 195 |
| PALB2 | chr16 | 23641064  | 23641260  | GAGTCAACAGTCAAGTATGAGTTG      | CTCAGTCTTCTGCCAGTGAATA       | 23 | 23 | 149 | 195 |
| PALB2 | chr16 | 23641189  | 23641388  | ATGAGCAAGTGGGGTGTGC           | CTCAAGGCTCTATGAAAAAGC        | 23 | 23 | 151 | 197 |
| PALB2 | chr16 | 23641246  | 23641444  | ATAGGAGCCTTGAAGGCCAAA         | CGGGCTTTCTTCCATATTAAT        | 25 | 25 | 155 | 200 |
| PALB2 | chr16 | 23641297  | 23641488  | AGGTGAACACATGTCTGTGGTAG       | TTACCAGGAAAATACACATCCA       | 21 | 23 | 155 | 199 |
| PALB2 | chr16 | 23641355  | 23641541  | GGAGTATAAAGTAAATGGATGAAAGAGC  | CGCATGGATACAGAAATGGAGGA      | 23 | 23 | 146 | 192 |
| PALB2 | chr16 | 23641463  | 23641633  | AAGTCTCCATTTCTGATCAATGC       | AGAGACATCTTAAAGAGGGAAGCTG    | 31 | 25 | 131 | 187 |
| PALB2 | chr16 | 23641559  | 23641731  | TCAAAGGGCTCCACTGGTTTTC        | ACTTGAAGAAGACTTTGGACCTC      | 25 | 23 | 123 | 171 |
| PALB2 | chr16 | 23641644  | 23641843  | CTGTGATCTGAGAAAAGACAGTAGT     | CTTGTGATGATGAGGCTTTCAC       | 23 | 23 | 127 | 173 |
| PALB2 | chr16 | 23646073  | 23646272  | acactggcCTGTCACTTTT           | TGCTGTTTGTGGGTTTTGTT         | 26 | 23 | 151 | 200 |
| PALB2 | chr16 | 23646250  | 23646438  | AACAATCGACAGCTAGAAAGTTG       | CAACTCTAGCCTGTGCAATTT        | 22 | 23 | 155 | 200 |
| PALB2 | chr16 | 23646305  | 23646480  | GTGCAGCTGATTTCTTTTCC          | ACCTCTCAGAACTCTCTAATGAT      | 23 | 26 | 140 | 189 |
| PALB2 | chr16 | 23646420  | 23646592  | AGAGAAGTTTCTGAGAGTTCTGGA      | ATTAGAGTGTCTGGCAATGAC        | 23 | 23 | 130 | 176 |
| PALB2 | chr16 | 23646508  | 23646698  | AAGGTTAAATTTTACTGCACTTAT      | GGAGGCTGTCAATCAGATCAT        | 25 | 23 | 125 | 173 |
| PALB2 | chr16 | 23646599  | 23646791  | ACTTTCCTTGGCAATGGACAT         | CTGCAGAAAACATCTTGACA         | 31 | 23 | 137 | 191 |
| PALB2 | chr16 | 23646733  | 23646929  | AGTTTGAATGAAATCTTCTTCTG       | GTGACACTTGTATGGCAGGAT        | 23 | 23 | 147 | 193 |
| PALB2 | chr16 | 23646919  | 23647101  | GGGAGTGTGCCACTTTACTTATA       | GCCAACTGCCCAAGTTCTAAT        | 27 | 23 | 147 | 197 |
| PALB2 | chr16 | 23646992  | 23647191  | TGTGCTTCAAATCTACAGT           | AGGAGTATGATGACACACTT         | 23 | 21 | 139 | 183 |
| PALB2 | chr16 | 23647117  | 23647307  | TAAAGGAACCTGATGCGCCCT         | ACTGCCCAACAGAAAAGGT          | 21 | 21 | 158 | 200 |
| PALB2 | chr16 | 23647173  | 23647351  | CTTTTCTGTTGGGCAAGTTGG         | CTGTAGACTCACAGTAACCTGAA      | 22 | 24 | 145 | 191 |
| PALB2 | chr16 | 23647303  | 23647497  | AGCAGGATTTTGTACTGATTTCT       | TGGAAAAGCACTAAAGGAACAGGA     | 22 | 24 | 133 | 179 |
| PALB2 | chr16 | 23647438  | 23647630  | CAGCTTCTGCTTTTGTCCACC         | AAAAGAACAATTTTCCACAG         | 25 | 23 | 147 | 195 |
| PALB2 | chr16 | 23647607  | 23647786  | TGGGTTTTGATGTGAACTGTGATC      | TGACAAGTTACACATCAAAACCCA     | 21 | 24 | 148 | 193 |
| PALB2 | chr16 | 23649110  | 23649300  | AGCCAAAATTAACCTGGGAAATGA      | TGAATGAATGCTACTTCTTAAAT      | 31 | 24 | 124 | 180 |
| PALB2 | chr16 | 23649324  | 23649504  | AGAGTCAAGAACCTGTTTTAAATTTGTTG | TTCTGGGGCTGTTTTGTCTCC        | 24 | 22 | 145 | 191 |
| PALB2 | chr16 | 23652326  | 23652511  | AGATGATAGCTGCTGCCCTCG         | CTCTGACTCCACTTCCACTGT        | 23 | 29 | 129 | 181 |
| XRCC2 | chr7  | 152345680 | 152345871 | TTAAGGTTGGCTGATGACCTGT        | GAGCGTCTCTTCTTGTCTG          | 20 | 22 | 144 | 186 |
| XRCC2 | chr7  | 152345730 | 152345916 | ACAAAATTAACCCCACTTCTCC        | actTGTGAAGCACAGGATTTTT       | 23 | 23 | 146 | 192 |
| XRCC2 | chr7  | 152345847 | 152346021 | GAAAAACATCTGTGCTTACCA         | TGTGGACAAGACTACAGACCTT       | 24 | 23 | 140 | 187 |
| XRCC2 | chr7  | 152345919 | 152346111 | ACACAGTCTGAGAGGACAT           | TGAAAATGACTACTGCTGGTCT       | 24 | 24 | 128 | 175 |
| XRCC2 | chr7  | 152346023 | 152346203 | GCTTCTCAAGCACTGAGAACAT        | TTTTTACTGGATAGACCCGGTCA      | 20 | 23 | 150 | 193 |
| XRCC2 | chr7  | 152346086 | 152346283 | CATTGACCGGTTCTATCCAGTAA       | AGCAACCACTACTTCTTACAT        | 23 | 23 | 135 | 181 |
| XRCC2 | chr7  | 152346180 | 152346364 | AAGTGAAGAAGTAAGTGGGTGCT       | TTGACAGACACTTCCAAAAGC        | 24 | 23 | 152 | 198 |
| XRCC2 | chr7  | 152346259 | 152346438 | GAGCTTGGGATGATCTGTGCTC        | AATCAGAAGGTGGCTGGAAGT        | 24 | 23 | 138 | 185 |
|       |       |           |           |                               | TGAATTCATGGCCAGAAAGAA        | 23 | 23 | 134 | 180 |

|       |      |           |           |                           |                           |    |    |             |     |    |
|-------|------|-----------|-----------|---------------------------|---------------------------|----|----|-------------|-----|----|
| XRCC2 | chr7 | 152346296 | 152346494 | GCCGGAGCAATCAAAGTGGTAA    | CCCTTGAGTACTGCATTTGAC     | 23 | 23 | 153         | 199 | 39 |
| XRCC2 | chr7 | 152357715 | 152357901 | ACATGTGAGTTATGTGAAAAATCCT | AAATAAGATTTTCCTTCTCTGTTTT | 26 | 29 | 132         | 187 | 32 |
| XRCC2 | chr7 | 152373031 | 152373227 | CCCCAAGCCTCCAATCC         | CAGTTGGTGAATGGGTGGT       | 18 | 21 | 158         | 197 | 66 |
|       |      |           |           |                           |                           |    |    | 138.5258216 |     |    |
