# Supplementary material for: Rare, protein-truncating variants in ATM, CHEK2 and PALB2, but not XRCC2, are associated with increased breast cancer risks
Source: PubMed Central journal article supplement (PMC5740532; doi:10.1136/jmedgenet-2017-104588), 2017-08-04
Supplement: jmedgenet-2017-104588supp002.pdf [file jmedgenet-2017-104588supp002.pdf]

Table S2. Design, callable bases, and depth summary.

|              | Ensembl Transcript ID | Ensembl Protein ID | Exon Length | Amplicons | Percent Target<br>Sequence<br>Covered | Percent Callable Bases within Target |       |      | Sequence Depth Coverage per Gene |       |       |
|--------------|-----------------------|--------------------|-------------|-----------|---------------------------------------|--------------------------------------|-------|------|----------------------------------|-------|-------|
|              |                       |                    |             |           |                                       | Median                               | Mean  | SD   | Median                           | Mean  | SD    |
| <i>ATM</i>   | ENST00000278616.4     | ENSP00000278616.4  | 9171        | 135       | 99.7%                                 | 99.2%                                | 98.8% | 0.6% | 425.2                            | 428.6 | 99.2  |
| <i>CHEK2</i> | ENST00000328354.6     | ENSP00000329178.6  | 1632        | 25        | 100.0%                                | 97.1%                                | 97.0% | 0.7% | 399.4                            | 404.9 | 88.7  |
| <i>PALB2</i> | ENST00000261584.4     | ENSP00000261584.4  | 3561        | 50        | 97.7%                                 | 96.9%                                | 96.9% | 0.3% | 454.8                            | 460.2 | 101.9 |
| <i>XRCC2</i> | ENST00000359321.1     | ENSP00000352271.1  | 843         | 11        | 100.0%                                | 99.9%                                | 99.6% | 1.5% | 472.2                            | 481.8 | 118.6 |
