# Supplementary material for: Rare, protein-truncating variants in ATM, CHEK2 and PALB2, but not XRCC2, are associated with increased breast cancer risks
Source: PubMed Central journal article supplement (PMC5740532; doi:10.1136/jmedgenet-2017-104588), 2017-08-04
Supplement: jmedgenet-2017-104588supp003.pdf [file jmedgenet-2017-104588supp003.pdf]

**Table S3.** Concordance between duplicates and agreement between orthogonal genotyping methods.

|                                       | <b>iCOGS SNPs</b> | <b>OncoArray Indels</b> | <b>TOTAL</b> |
|---------------------------------------|-------------------|-------------------------|--------------|
| <b>Samples</b>                        | 13779             | 4320                    |              |
| <b>Polymorphic variants</b>           | 37                | 80                      |              |
| <b>No found on sequencing</b>         | 4                 | 7                       |              |
| <b>Rare variants (MAF&lt;0.01)</b>    |                   |                         |              |
| Variants                              | 26                | 70                      |              |
| Correctly called by sequencing        | 716               | 543                     | 1259         |
| Incorrectly called by sequencing      | 5                 | 11                      | 16           |
| Not called by sequencing              | 12                | 43                      | 55           |
| Variant not found by sequencing       | 13                | 15                      | 28           |
| Sensitivity (called genotypes only)   | 99.30%            | 98.00%                  | 98.70%       |
| Sensitivity (all known heterozygotes) | 95.98%            | 88.70%                  | 92.70%       |
| <b>Common variants (MAF&gt;=0.01)</b> |                   |                         |              |
| Variants                              | 11                | 10                      | 21           |
| Concordant                            | 145744            | 42987                   | 188731       |
| Not concordant                        | 71                | 2                       | 73           |
| Concordance                           | 99.95%            | 99.995%                 | 99.96%       |
