# Supplementary material for: Rare, protein-truncating variants in ATM, CHEK2 and PALB2, but not XRCC2, are associated with increased breast cancer risks
Source: PubMed Central journal article supplement (PMC5740532; doi:10.1136/jmedgenet-2017-104588), 2017-08-04
Supplement: jmedgenet-2017-104588supp004.pdf [file jmedgenet-2017-104588supp004.pdf]

**Table S4.** Tally of variants by primary annotation category and frequency.

| <b>Total Number of Variants Discovered by Gene and Type</b> |                   |              |          |            |            |            |             |              |            |          |             |
|-------------------------------------------------------------|-------------------|--------------|----------|------------|------------|------------|-------------|--------------|------------|----------|-------------|
|                                                             | Canonical Splice* | Frame Shift* | Inframe  | Intronic   | Missense   | Regulatory | Splice Site | Stop Gained* | Synonymous | UTR      | Total       |
| <b>ATM</b>                                                  | 10                | 25           | 4        | 230        | 324        | 6          | 43          | 24           | 119        | 0        | <b>785</b>  |
| <b>CHEK2</b>                                                | 2                 | 6            | 0        | 40         | 77         | 8          | 11          | 7            | 11         | 3        | <b>165</b>  |
| <b>PALB2</b>                                                | 0                 | 18           | 1        | 28         | 125        | 11         | 8           | 16           | 48         | 0        | <b>255</b>  |
| <b>XRCC2</b>                                                | 2                 | 4            | 0        | 0          | 34         | 13         | 1           | 5            | 8          | 1        | <b>68</b>   |
| <b>Total</b>                                                | <b>14</b>         | <b>53</b>    | <b>5</b> | <b>298</b> | <b>560</b> | <b>38</b>  | <b>63</b>   | <b>52</b>    | <b>186</b> | <b>4</b> | <b>1273</b> |

| <b>Variants Classified as Common (Carrier Frequency &gt;0.1%) by Gene and Type</b> |                   |              |          |           |           |            |             |              |            |          |           |
|------------------------------------------------------------------------------------|-------------------|--------------|----------|-----------|-----------|------------|-------------|--------------|------------|----------|-----------|
|                                                                                    | Canonical Splice* | Frame Shift* | Inframe  | Intronic  | Missense  | Regulatory | Splice Site | Stop Gained* | Synonymous | UTR      | Total     |
| <b>ATM</b>                                                                         | 0                 | 0            | 0        | 10        | 25        | 0          | 4           | 0            | 11         | 0        | <b>50</b> |
| <b>CHEK2</b>                                                                       | 0                 | 1            | 0        | 0         | 4         | 0          | 0           | 0            | 1          | 0        | <b>6</b>  |
| <b>PALB2</b>                                                                       | 0                 | 0            | 0        | 2         | 7         | 0          | 0           | 0            | 4          | 0        | <b>13</b> |
| <b>XRCC2</b>                                                                       | 0                 | 0            | 0        | 0         | 2         | 0          | 0           | 0            | 0          | 1        | <b>3</b>  |
| <b>Total</b>                                                                       | <b>0</b>          | <b>1</b>     | <b>0</b> | <b>12</b> | <b>38</b> | <b>0</b>   | <b>4</b>    | <b>0</b>     | <b>16</b>  | <b>1</b> | <b>72</b> |

| <b>Variants Classified as Rare (Carrier Frequency &lt;0.1%) by Gene and Type</b> |                   |              |          |            |            |            |             |              |            |          |             |
|----------------------------------------------------------------------------------|-------------------|--------------|----------|------------|------------|------------|-------------|--------------|------------|----------|-------------|
|                                                                                  | Canonical Splice* | Frame Shift* | Inframe  | Intronic   | Missense   | Regulatory | Splice Site | Stop Gained* | Synonymous | UTR      | Total       |
| <b>ATM</b>                                                                       | 10                | 25           | 4        | 220        | 299        | 6          | 39          | 24           | 108        | 0        | <b>735</b>  |
| <b>CHEK2</b>                                                                     | 2                 | 5            | 0        | 40         | 73         | 8          | 11          | 7            | 10         | 3        | <b>159</b>  |
| <b>PALB2</b>                                                                     | 0                 | 18           | 1        | 26         | 118        | 11         | 8           | 16           | 44         | 0        | <b>242</b>  |
| <b>XRCC2</b>                                                                     | 2                 | 4            | 0        | 0          | 32         | 13         | 1           | 5            | 8          | 0        | <b>65</b>   |
| <b>Total</b>                                                                     | <b>14</b>         | <b>52</b>    | <b>5</b> | <b>286</b> | <b>522</b> | <b>38</b>  | <b>59</b>   | <b>52</b>    | <b>170</b> | <b>3</b> | <b>1201</b> |

\*Truncating variants
