# Supplementary material for: Rare, protein-truncating variants in ATM, CHEK2 and PALB2, but not XRCC2, are associated with increased breast cancer risks
Source: PubMed Central journal article supplement (PMC5740532; doi:10.1136/jmedgenet-2017-104588), 2017-08-04
Supplement: jmedgenet-2017-104588supp006.pdf [file jmedgenet-2017-104588supp006.pdf]

**Table S6.** Risk estimates of overall breast cancer and estrogen-receptor subtypes for truncating variants using ExAC controls.

|              |             | ExAC European           |                | ExAC All                |                |
|--------------|-------------|-------------------------|----------------|-------------------------|----------------|
|              |             | OR (95% CI)             | P-Value        | OR (95% CI)             | P-Value        |
| <i>ATM</i>   | Overall     | <b>2.18 (1.63-2.91)</b> | <b>1.1E-07</b> | <b>2.62 (2.01-3.42)</b> | <b>3.8E-13</b> |
|              | ER Positive | <b>2.13 (1.52-3.00)</b> | <b>1.3E-05</b> | <b>2.57 (1.86-3.54)</b> | <b>4.4E-09</b> |
|              | ER Negative | 0.86 (0.32-2.34)        | 1.0            | 1.03 (0.38-2.79)        | 0.80           |
| <i>CHEK2</i> | Overall     | <b>2.73 (2.25-3.31)</b> | <b>2.2E-16</b> | <b>3.34 (2.80-3.99)</b> | <b>2.2E-16</b> |
|              | ER Positive | <b>2.99 (2.41-3.73)</b> | <b>2.2E-16</b> | <b>3.67 (3.00-4.49)</b> | <b>2.2E-16</b> |
|              | ER Negative | 1.39 (0.19-2.45)        | 0.32           | 1.70 (0.98-2.97)        | 0.087          |
| <i>PALB2</i> | Overall     | <b>5.30 (3.69-7.64)</b> | <b>2.2E-16</b> | <b>4.11 (3.09-5.48)</b> | <b>2.2E-16</b> |
|              | ER Positive | <b>4.27 (2.80-6.52)</b> | <b>6.7E-13</b> | <b>3.32 (2.32-4.74)</b> | <b>8.9E-12</b> |
|              | ER Negative | <b>5.56 (2.86-10.8)</b> | <b>7.7E-08</b> | <b>4.32 (2.31-8.06)</b> | <b>2.6E-06</b> |
| <i>XRCC2</i> | Overall     | 1.04 (0.48-2.27)        | 1.0            | 1.26 (0.60-2.62)        | 0.69           |
|              | ER Positive | 1.01 (0.38-2.66)        | 1.0            | 1.16 (0.45-2.98)        | 0.95           |
|              | ER Negative | 0.98 (0.13-7.25)        | 1.0            | 1.17 (0.16-8.60)        | 0.58           |
