# Supplementary material for: Rare, protein-truncating variants in ATM, CHEK2 and PALB2, but not XRCC2, are associated with increased breast cancer risks
Source: PubMed Central journal article supplement (PMC5740532; doi:10.1136/jmedgenet-2017-104588), 2017-08-04
Supplement: jmedgenet-2017-104588supp007.pdf [file jmedgenet-2017-104588supp007.pdf]

Table S7. Risk estimates for common missense, synonymous, and non-coding variants.

| Gene  | VEP Consequences          | Amino Acid Substitution | SEACH Case Homozygote Count | SEARCH Case Heterozygote Count | SEARCH Case Non-Carrier Count | SEACH Control Homozygote Count | SEARCH Control Heterozygote Count | SEARCH Control Non-Carrier Count | Odds Ratio | 95% CI    | Conchran-Armitage P-Trend |
|-------|---------------------------|-------------------------|-----------------------------|--------------------------------|-------------------------------|--------------------------------|-----------------------------------|----------------------------------|------------|-----------|---------------------------|
| CHEK2 | splice,intron             | NA                      | 0                           | 33                             | 13054                         | 0                              | 1                                 | 5487                             | 13.9       | 1.89-101  | 6.7E-04                   |
| ATM   | missense                  | C2464R                  | 0                           | 16                             | 13071                         | 0                              | 18                                | 5470                             | 0.37       | 0.19-0.73 | 2.8E-03                   |
| XRCC2 | 3_prime_UTR               | NA                      | 1                           | 32                             | 13054                         | 0                              | 3                                 | 5485                             | 4.76       | 1.46-15.5 | 5.3E-03                   |
| XRCC2 | missense                  | R188H                   | 108                         | 1931                           | 11048                         | 42                             | 909                               | 4537                             | 0.90       | 0.83-0.97 | 8.0E-03                   |
| CHEK2 | 3_prime_UTR               | NA                      | 0                           | 34                             | 13053                         | 0                              | 5                                 | 5483                             | 2.85       | 1.12-7.30 | 0.022                     |
| ATM   | splice,intron             | NA                      | 0                           | 85                             | 13002                         | 0                              | 21                                | 5467                             | 1.70       | 1.05-2.74 | 0.028                     |
| PALB2 | synonymous                | NA                      | 0                           | 57                             | 13030                         | 0                              | 13                                | 5475                             | 1.84       | 1.01-3.36 | 0.044                     |
| ATM   | missense                  | K1454N                  | 0                           | 15                             | 13072                         | 0                              | 1                                 | 5487                             | 6.29       | 0.83-47.6 | 0.052                     |
| ATM   | missense                  | L2307F                  | 0                           | 15                             | 13072                         | 0                              | 1                                 | 5487                             | 6.29       | 0.83-47.6 | 0.052                     |
| ATM   | missense                  | A1309T                  | 0                           | 40                             | 13047                         | 0                              | 27                                | 5461                             | 0.62       | 0.38-1.01 | 0.053                     |
| ATM   | missense                  | S707P                   | 6                           | 339                            | 12742                         | 3                              | 115                               | 5370                             | 1.22       | 0.99-1.50 | 0.064                     |
| ATM   | missense                  | Y1442H                  | 0                           | 18                             | 13069                         | 0                              | 14                                | 5474                             | 0.54       | 0.27-1.08 | 0.078                     |
| CHEK2 | intron                    | NA                      | 0                           | 54                             | 13033                         | 0                              | 33                                | 5455                             | 0.69       | 0.44-1.05 | 0.086                     |
| ATM   | missense                  | S333F                   | 0                           | 46                             | 13041                         | 0                              | 11                                | 5477                             | 1.75       | 0.91-3.39 | 0.089                     |
| CHEK2 | intron                    | NA                      | 5147                        | 6054                           | 1886                          | 2201                           | 2551                              | 736                              | 0.96       | 0.91-1.01 | 0.11                      |
| ATM   | synonymous                | NA                      | 0                           | 62                             | 13025                         | 0                              | 17                                | 5471                             | 1.53       | 0.89-2.62 | 0.12                      |
| ATM   | missense                  | H1380Y                  | 0                           | 25                             | 13062                         | 0                              | 5                                 | 5483                             | 2.10       | 0.80-5.48 | 0.12                      |
| ATM   | intron                    | NA                      | 0                           | 25                             | 13062                         | 0                              | 5                                 | 5483                             | 2.10       | 0.80-2.48 | 0.12                      |
| ATM   | upstream                  | NA                      | 0                           | 25                             | 13062                         | 0                              | 5                                 | 5483                             | 2.10       | 0.80-2.48 | 0.12                      |
| ATM   | intron                    | NA                      | 0                           | 11                             | 13076                         | 0                              | 9                                 | 5479                             | 0.51       | 0.21-1.24 | 0.13                      |
| ATM   | intron                    | NA                      | 0                           | 31                             | 13056                         | 0                              | 7                                 | 5481                             | 1.86       | 0.82-4.22 | 0.13                      |
| ATM   | missense                  | D1853V                  | 0                           | 133                            | 12954                         | 0                              | 43                                | 5445                             | 1.29       | 0.92-1.83 | 0.14                      |
| CHEK2 | missense                  | S428F                   | 0                           | 2                              | 13085                         | 0                              | 3                                 | 5485                             | 0.28       | 1.15-1.67 | 0.14                      |
| ATM   | missense                  | D1853N                  | 253                         | 3231                           | 9603                          | 120                            | 1392                              | 3976                             | 0.95       | 0.90-1.02 | 0.14                      |
| ATM   | missense                  | Y1475C                  | 0                           | 36                             | 13051                         | 0                              | 22                                | 5466                             | 0.69       | 0.40-1.17 | 0.16                      |
| CHEK2 | missense                  | H157T                   | 0                           | 20                             | 13067                         | 0                              | 4                                 | 5484                             | 2.10       | 0.72-6.14 | 0.17                      |
| ATM   | intron,feature_truncation | NA                      | 252                         | 3230                           | 9605                          | 119                            | 1388                              | 3981                             | 0.96       | 0.90-1.02 | 0.17                      |
| ATM   | intron                    | NA                      | 2                           | 232                            | 12853                         | 0                              | 115                               | 5373                             | 0.86       | 0.69-1.08 | 0.18                      |
| ATM   | missense                  | S1691R                  | 0                           | 53                             | 13034                         | 0                              | 29                                | 5459                             | 0.77       | 0.49-1.21 | 0.25                      |
| PALB2 | missense                  | G998E                   | 4                           | 587                            | 12496                         | 0                              | 270                               | 5218                             | 0.92       | 0.80-1.07 | 0.27                      |
| ATM   | synonymous                | NA                      | 0                           | 32                             | 13055                         | 0                              | 9                                 | 5479                             | 1.49       | 0.71-3.12 | 0.29                      |
| ATM   | missense                  | P604S                   | 0                           | 34                             | 13053                         | 0                              | 19                                | 5469                             | 0.75       | 0.43-1.32 | 0.31                      |
| ATM   | intron                    | NA                      | 12                          | 426                            | 12649                         | 3                              | 167                               | 5318                             | 1.09       | 0.92-1.30 | 0.33                      |
| ATM   | missense                  | V182L                   | 0                           | 16                             | 13071                         | 0                              | 4                                 | 5484                             | 1.68       | 0.56-5.02 | 0.35                      |
| PALB2 | missense                  | Q559R                   | 89                          | 2047                           | 10951                         | 41                             | 882                               | 4565                             | 0.96       | 0.89-1.04 | 0.37                      |
| ATM   | intron,feature_truncation | NA                      | 0                           | 29                             | 13058                         | 0                              | 16                                | 5472                             | 0.76       | 0.41-1.40 | 0.38                      |
| CHEK2 | synonymous                | NA                      | 13                          | 642                            | 12432                         | 3                              | 257                               | 5228                             | 1.07       | 0.92-1.23 | 0.38                      |
| PALB2 | downstream                | NA                      | 0                           | 23                             | 13064                         | 0                              | 13                                | 5475                             | 0.74       | 0.38-1.46 | 0.39                      |
| ATM   | intron                    | NA                      | 2                           | 254                            | 12831                         | 0                              | 98                                | 5390                             | 1.11       | 0.87-1.40 | 0.40                      |
| ATM   | synonymous                | NA                      | 0                           | 40                             | 13047                         | 0                              | 13                                | 5475                             | 1.29       | 0.69-2.41 | 0.42                      |
| ATM   | missense                  | V2079I                  | 1                           | 16                             | 13070                         | 0                              | 5                                 | 5483                             | 1.51       | 0.56-4.07 | 0.43                      |
| PALB2 | synonymous                | NA                      | 0                           | 42                             | 13045                         | 0                              | 14                                | 5474                             | 1.26       | 0.69-2.31 | 0.46                      |
| ATM   | missense                  | D126E                   | 0                           | 39                             | 13048                         | 0                              | 13                                | 5475                             | 1.25       | 0.67-2.36 | 0.47                      |
| ATM   | intron                    | NA                      | 0                           | 39                             | 13048                         | 0                              | 13                                | 5475                             | 1.26       | 0.67-2.36 | 0.47                      |
| ATM   | intron                    | NA                      | 0                           | 39                             | 13048                         | 0                              | 13                                | 5475                             | 1.26       | 0.67-2.36 | 0.47                      |
| PALB2 | intron                    | NA                      | 755                         | 4716                           | 7616                          | 303                            | 1968                              | 3217                             | 1.02       | 0.97-1.07 | 0.49                      |
| ATM   | intron                    | NA                      | 0                           | 36                             | 13051                         | 0                              | 12                                | 5476                             | 1.26       | 0.65-2.42 | 0.49                      |
| ATM   | missense                  | F1463C                  | 0                           | 14                             | 13073                         | 0                              | 4                                 | 5484                             | 1.47       | 0.48-4.46 | 0.50                      |
| ATM   | intron                    | NA                      | 0                           | 38                             | 13049                         | 0                              | 13                                | 5475                             | 1.23       | 0.65-2.30 | 0.53                      |
| ATM   | missense                  | G2023R                  | 0                           | 45                             | 13042                         | 0                              | 22                                | 5466                             | 0.85       | 0.51-1.43 | 0.55                      |
| CHEK2 | missense                  | R180C                   | 0                           | 24                             | 13063                         | 0                              | 8                                 | 5480                             | 1.26       | 0.57-2.80 | 0.57                      |
| ATM   | splice,intron             | NA                      | 0                           | 77                             | 13010                         | 0                              | 36                                | 5452                             | 0.90       | 0.60-1.33 | 0.59                      |
| PALB2 | missense                  | L939W                   | 0                           | 47                             | 13040                         | 0                              | 17                                | 5471                             | 1.16       | 0.67-2.02 | 0.60                      |
| ATM   | synonymous                | NA                      | 0                           | 24                             | 13063                         | 0                              | 12                                | 5476                             | 0.84       | 0.42-1.68 | 0.62                      |
| ATM   | missense                  | F858L                   | 8                           | 388                            | 12691                         | 1                              | 175                               | 5312                             | 0.96       | 0.80-1.14 | 0.63                      |
| PALB2 | missense                  | P864S                   | 0                           | 114                            | 12973                         | 0                              | 44                                | 5444                             | 1.09       | 0.77-1.54 | 0.64                      |
| XRCC2 | missense                  | I95V                    | 0                           | 15                             | 13072                         | 0                              | 5                                 | 5483                             | 1.26       | 0.46-3.46 | 0.66                      |
| ATM   | splice,intron             | NA                      | 6                           | 837                            | 12244                         | 6                              | 335                               | 5147                             | 1.03       | 0.90-1.17 | 0.68                      |
| ATM   | missense                  | S978P                   | 0                           | 25                             | 13062                         | 0                              | 9                                 | 5479                             | 1.16       | 0.54-2.50 | 0.69                      |
| ATM   | missense                  | V410A                   | 1                           | 73                             | 13013                         | 0                              | 29                                | 5459                             | 1.08       | 0.71-1.67 | 0.71                      |
| ATM   | missense                  | L1420F                  | 2                           | 485                            | 12600                         | 6                              | 199                               | 5283                             | 0.97       | 0.82-1.14 | 0.73                      |
| PALB2 | synonymous                | NA                      | 1                           | 153                            | 12933                         | 1                              | 60                                | 5427                             | 1.05       | 0.78-1.41 | 0.75                      |
| ATM   | regulatory                | NA                      | 1                           | 139                            | 12947                         | 0                              | 62                                | 5426                             | 0.95       | 0.71-1.29 | 0.76                      |
| PALB2 | synonymous                | NA                      | 11                          | 792                            | 12284                         | 1                              | 346                               | 5141                             | 0.98       | 0.86-1.11 | 0.76                      |
| ATM   | synonymous                | NA                      | 0                           | 76                             | 13011                         | 0                              | 30                                | 5458                             | 1.06       | 0.70-1.62 | 0.78                      |
| PALB2 | missense                  | E672Q                   | 11                          | 792                            | 12284                         | 1                              | 345                               | 5142                             | 0.98       | 0.87-1.12 | 0.79                      |
| CHEK2 | intron,feature_elongation | NA                      | 363                         | 3580                           | 9144                          | 159                            | 1476                              | 3853                             | 1.01       | 0.95-1.07 | 0.80                      |
| ATM   | missense                  | F582L                   | 0                           | 6                              | 13081                         | 0                              | 3                                 | 5485                             | 0.83       | 0.21-3.35 | 0.80                      |
| ATM   | synonymous                | NA                      | 0                           | 98                             | 12989                         | 0                              | 43                                | 5445                             | 0.96       | 0.67-1.37 | 0.80                      |
| PALB2 | intron                    | NA                      | 0                           | 15                             | 13072                         | 0                              | 7                                 | 5481                             | 0.90       | 0.37-2.20 | 0.82                      |
| PALB2 | missense                  | L337S                   | 4                           | 540                            | 12543                         | 4                              | 225                               | 5259                             | 0.99       | 0.84-1.15 | 0.86                      |
| ATM   | upstream                  | NA                      | 1                           | 195                            | 12891                         | 0                              | 84                                | 5404                             | 0.98       | 0.76-1.27 | 0.90                      |
| ATM   | synonymous                | NA                      | 1                           | 195                            | 12891                         | 0                              | 84                                | 5404                             | 0.98       | 0.76-1.27 | 0.90                      |
| ATM   | missense                  | S49C                    | 4                           | 370                            | 12713                         | 1                              | 158                               | 5329                             | 0.99       | 0.82-1.19 | 0.92                      |
| ATM   | synonymous                | NA                      | 33                          | 1247                           | 11807                         | 18                             | 517                               | 4953                             | 1.00       | 0.90-1.10 | 0.93                      |
| ATM   | splice,intron             | NA                      | 29                          | 1120                           | 11938                         | 14                             | 464                               | 5010                             | 1.00       | 0.90-1.12 | 0.94                      |
| ATM   | intron                    | NA                      | 4378                        | 6323                           | 2386                          | 1827                           | 2665                              | 996                              | 1.00       | 0.96-1.05 | 0.94                      |
| ATM   | intron                    | NA                      | 4225                        | 6369                           | 2493                          | 1777                           | 2664                              | 1047                             | 1.00       | 0.95-1.04 | 0.95                      |
| ATM   | missense                  | P1054R                  | 14                          | 735                            | 12338                         | 2                              | 315                               | 5171                             | 1.00       | 0.88-1.15 | 0.96                      |
| ATM   | synonymous                | NA                      | 3                           | 329                            | 12755                         | 2                              | 136                               | 5350                             | 1.00       | 0.82-1.22 | 0.97                      |
| ATM   | downstream                | NA                      | 0                           | 134                            | 12953                         | 1                              | 54                                | 5433                             | 1.00       | 0.73-1.37 | 0.98                      |
| ATM   | intron                    | NA                      | 4376                        | 6329                           | 2382                          | 1830                           | 2664                              | 994                              | 1.00       | 0.96-1.05 | 1.00                      |
| PALB2 | missense                  | V932M                   | 0                           | 155                            | 12932                         | 0                              | 65                                | 5423                             | 1.00       | 0.75-1.34 | 1.00                      |
| CHEK2 | missense                  | Y424H                   | 0                           | 2                              | 13085                         | 0                              | 0                                 | 5488                             | NA         | NA        | NA                        |

| Chromosome | Position  | Reference Allele | Alternate Allele | Known Variation                                                   | CADD Scaled Score | PolyPhen2 Category | SIFT Category | ExAC Non-Finnish European Carrier Frequency |
|------------|-----------|------------------|------------------|-------------------------------------------------------------------|-------------------|--------------------|---------------|---------------------------------------------|
| 22         | 29121360  | A                | T                | CS086685,rs121908700                                              | 12.02             | NA                 | NA            | 0                                           |
| 11         | 108201023 | T                | C                | CM016183,rs55801750,COSM758329                                    | 21.9              | possibly_damaging  | tolerated     | 0.00204                                     |
| 7          | 152345726 | A                | G                | rs3218539                                                         | 12.68             | NA                 | NA            | 0                                           |
| 7          | 152346007 | C                | T                | rs3218536,CM021368                                                | 15.95             | benign             | tolerated     | 0.15267                                     |
| 22         | 29083867  | G                | A                | rs17884403                                                        | 6.344             | NA                 | NA            | 0                                           |
| 11         | 108119654 | T                | G                | rs201686625,CS000846,COSM758349                                   | 11.93             | NA                 | NA            | 0                                           |
| 16         | 23614846  | C                | T                | rs45439097                                                        | 18.52             | NA                 | NA            | 0.002157885                                 |
| 11         | 108160454 | A                | C                | CM0910503,rs148993589,COSM22501                                   | 15.75             | benign             | tolerated     | 0.00134                                     |
| 11         | 108196896 | C                | T                | rs56009889                                                        | 31                | probably_damaging  | deleterious   | 0.00384                                     |
| 11         | 108155132 | G                | A                | rs149711770,COSM22507                                             | 20.6              | benign             | tolerated     | 0.00183                                     |
| 11         | 108124761 | T                | C                | rs4986761,CM013692,COSM41595                                      | 15.81             | benign             | tolerated     | 0.02192                                     |
| 11         | 108160416 | T                | C                | rs201666889,CM0910502                                             | 27.3              | probably_damaging  | deleterious   | 0.00150                                     |
| 22         | 29121207  | G                | A                | rs121908699                                                       | 2.665             | NA                 | NA            | 0                                           |
| 11         | 108117787 | C                | T                | rs28904919                                                        | 25.9              | possibly_damaging  | deleterious   | 0.00280                                     |
| 22         | 29091037  | G                | C                | rs5762749                                                         | 5.976             | NA                 | NA            | 0                                           |
| 11         | 108114792 | C                | T                | rs144709948,CM0910480                                             | 14.94             | NA                 | NA            | 0.004376037                                 |
| 11         | 108159732 | C                | T                | CM021944,rs3092856,COSM24627                                      | 6.964             | benign             | tolerated     | 0.00123                                     |
| 11         | 108114632 | T                | G                | rs2235001                                                         | 0.205             | NA                 | NA            | 0                                           |
| 11         | 108139120 | G                | T                | rs2234994                                                         | 6.735             | NA                 | NA            | 0                                           |
| 11         | 108218101 | T                | G                | rs200190537                                                       | 5.503             | NA                 | NA            | 0                                           |
| 11         | 108170698 | C                | T                | rs531375734                                                       | 3.042             | NA                 | NA            | 0                                           |
| 11         | 108175463 | A                | T                | rs1801673,CM083593,COSM1350895,COSM21628,COSM1350894,COSM3752120  | 23.6              | benign             | deleterious   | 0.01384                                     |
| 22         | 29091207  | G                | A                | CM051021,rs137853011,COSM2935967                                  | 29.8              | probably_damaging  | deleterious   | 0.00111                                     |
| 11         | 108175462 | G                | A                | CM077896,rs1801516,COSM41596,COSM3736031                          | 23.2              | benign             | tolerated     | 0.26659                                     |
| 11         | 108160516 | A                | G                | rs34640941,COSM22503                                              | 18.12             | benign             | tolerated     | 0.00153                                     |
| 22         | 29121087  | A                | G                | CM993368,rs17879961,COSM3693990                                   | 21.1              | benign             | tolerated     | 0.00947                                     |
| 11         | 108150207 | CT               | C                | rs1799757                                                         | 7.431             | NA                 | NA            | 0                                           |
| 11         | 108225473 | G                | A                | rs139490310                                                       | 2.938             | NA                 | NA            | 0                                           |
| 11         | 108170506 | A                | C                | CM980141,rs1800059                                                | 11.03             | benign             | tolerated     | 0.00623                                     |
| 16         | 23634293  | C                | T                | rs45551636,CM098533                                               | 33                | probably_damaging  | deleterious   | 0.04238                                     |
| 11         | 108121446 | A                | G                | rs4987943                                                         | 0.816             | NA                 | NA            | 0.001533695                                 |
| 11         | 108123551 | C                | T                | CM045888,rs2227922,COSM1350778,COSM22499,COSM1350777              | 24.3              | possibly_damaging  | tolerated     | 0.00742                                     |
| 11         | 108151688 | T                | A                | rs148368017                                                       | 7.549             | NA                 | NA            | 0                                           |
| 11         | 108114727 | G                | C                | CM035638,rs3218707                                                | 12.39             | benign             | tolerated     | 0.00223                                     |
| 16         | 23646191  | T                | C                | rs152451                                                          | 0.001             | benign             | tolerated     | 0.18324                                     |
| 11         | 108150364 | TATC             | T                | rs545376366                                                       | 7.454             | NA                 | NA            | 0                                           |
| 22         | 29130458  | T                | C                | rs1805129,COSM149275                                              | 2.59              | NA                 | NA            | 0.056860804                                 |
| 16         | 23637756  | G                | C                | rs180177119                                                       | 1.441             | NA                 | NA            | 0                                           |
| 11         | 108155240 | G                | A                | rs3218709                                                         | 5.965             | NA                 | NA            | 0                                           |
| 11         | 108218013 | C                | T                | rs56025670                                                        | 9.667             | NA                 | NA            | 0.001397072                                 |
| 11         | 108188136 | G                | A                | rs1800060                                                         | 0.005             | benign             | tolerated     | 0.00243                                     |
| 16         | 23646673  | C                | T                | rs61755173                                                        | 11.39             | NA                 | NA            | 0.002308915                                 |
| 11         | 108106443 | T                | A                | rs587781449,rs2234997,CM077897,COSM22498                          | 4.635             | benign             | tolerated     | 0.00324                                     |
| 11         | 108115778 | T                | G                | rs1800735                                                         | 5.574             | NA                 | NA            | 0                                           |
| 11         | 108165634 | A                | G                | rs3218678                                                         | 2.868             | NA                 | NA            | 0                                           |
| 16         | 23640467  | G                | A                | rs249954                                                          | 5.159             | NA                 | NA            | 0                                           |
| 11         | 108170680 | A                | G                | rs558610972                                                       | 6.493             | NA                 | NA            | 0                                           |
| 11         | 108160480 | T                | G                | CM022199,rs138327406,COSM22502,COSM1350855                        | 28.7              | probably_damaging  | deleterious   | 0.00446                                     |
| 11         | 108170373 | T                | G                | rs3092906                                                         | 8.257             | NA                 | NA            | 0                                           |
| 11         | 108186610 | G                | A                | rs11212587,CM092585,COSM24635                                     | 31                | probably_damaging  | deleterious   | 0.00465                                     |
| 22         | 29121019  | G                | A                | CM030417,rs77130927                                               | 23.2              | benign             | tolerated     | 0.00342                                     |
| 11         | 108202772 | G                | T                | CS014123,rs112775908                                              | 8.104             | NA                 | NA            | 0                                           |
| 16         | 23635348  | A                | C                | CM105609,rs45478192                                               | 28                | probably_damaging  | deleterious   | 0.00318                                     |
| 11         | 108124628 | T                | C                | rs1800055                                                         | 0.337             | NA                 | NA            | 0.001439108                                 |
| 11         | 108138003 | T                | C                | CM061641,rs1800056,COSM21826                                      | 8.823             | benign             | tolerated     | 0.02903                                     |
| 16         | 23637715  | G                | A                | CM105610,rs45568339                                               | 18.44             | benign             | tolerated     | 0.00806                                     |
| 7          | 152346287 | T                | C                | rs140214637                                                       | 0.001             | benign             | tolerated     | 0.00117                                     |
| 11         | 108175394 | T                | C                | rs3092829                                                         | 3.28              | NA                 | NA            | 0                                           |
| 11         | 108141988 | T                | C                | rs139552233,COSM922715,COSM21828,COSM1585357                      | 26.8              | possibly_damaging  | deleterious   | 0.00147                                     |
| 11         | 108119823 | T                | C                | CM035782,rs56128736,COSM1350756,COSM21825,COSM1350755,COSM1350754 | 23.2              | benign             | deleterious   | 0.00649                                     |
| 11         | 108160350 | C                | T                | CM000653,rs1800058                                                | 15.68             | benign             | tolerated     | 0.03759                                     |
| 16         | 23646295  | T                | C                | rs45472400                                                        | 0.365             | NA                 | NA            | 0.008181001                                 |
| 11         | 108190627 | T                | C                | rs116924981                                                       | 2.495             | NA                 | NA            | 0                                           |
| 16         | 23619235  | A                | C                | rs45516100                                                        | 0.079             | NA                 | NA            | 0.055712059                                 |
| 11         | 108163382 | C                | T                | rs4988008                                                         | 16.65             | NA                 | NA            | 0.004405682                                 |
| 16         | 23641461  | C                | G                | CM112099,rs45532440                                               | 8.057             | benign             | tolerated     | 0.05574                                     |
| 22         | 29130347  | G                | GT               | rs3841692                                                         | 2.024             | NA                 | NA            | 0                                           |
| 11         | 108122700 | T                | C                | CM023329,rs2235006                                                | 3.12              | benign             | tolerated     | 0.00201                                     |
| 11         | 108098592 | T                | C                | rs3218690                                                         | 0.051             | NA                 | NA            | 0.00498304                                  |
| 16         | 23634273  | A                | G                | rs180177128                                                       | 18.26             | NA                 | NA            | 0                                           |
| 16         | 23646857  | A                | G                | rs45494092,CM112098                                               | 5.275             | benign             | tolerated     | 0.03808                                     |
| 11         | 108139364 | T                | TA               | rs2234995                                                         | 3.857             | NA                 | NA            | 0                                           |
| 11         | 108180917 | T                | C                | rs3092910                                                         | 7.568             | NA                 | NA            | 0.012627022                                 |
| 11         | 108098576 | C                | G                | CM990201,rs1800054                                                | 25.1              | possibly_damaging  | deleterious   | 0.02247                                     |
| 11         | 108163487 | C                | T                | rs1800889                                                         | 12.84             | NA                 | NA            | 0.092004316                                 |
| 11         | 108224615 | A                | C                | rs4986839                                                         | 1.963             | NA                 | NA            | 0                                           |
| 11         | 108143182 | C                | T                | rs664677                                                          | 4.058             | NA                 | NA            | 0                                           |
| 11         | 108225483 | C                | T                | rs664982                                                          | 2.77              | NA                 | NA            | 0                                           |
| 11         | 108143456 | C                | G                | CM973365,rs1800057,COSM21827                                      | 26.5              | probably_damaging  | deleterious   | 0.05150                                     |
| 11         | 108115587 | G                | T                | rs3218674                                                         | 11.67             | NA                 | NA            | 0.031149753                                 |
| 11         | 108175387 | G                | C                | rs3092828                                                         | 0.772             | NA                 | NA            | 0                                           |
| 11         | 108225661 | A                | G                | rs664143                                                          | 0.543             | NA                 | NA            | 0                                           |
| 16         | 23635370  | C                | T                | rs45624036,CM112100                                               | 26.6              | probably_damaging  | tolerated     | 0.01617                                     |
| 22         | 29091220  | A                | G                | rs139366548                                                       | 28.7              | probably_damaging  | deleterious   | 0.00100                                     |
