# Supplementary material for: Rare, protein-truncating variants in ATM, CHEK2 and PALB2, but not XRCC2, are associated with increased breast cancer risks
Source: PubMed Central journal article supplement (PMC5740532; doi:10.1136/jmedgenet-2017-104588), 2017-08-04
Supplement: jmedgenet-2017-104588supp008.pdf [file jmedgenet-2017-104588supp008.pdf]

**Table S8.** Risk estimates for rare missense variants grouped by CADD, PolyPhen2, SIFT, and AlignGVGD predictions of deleteriousness.

|                                | <i>ATM</i>    |                  |                  |       |                   | <i>CHEK2</i>  |                  |                  |       |                   | <i>PALB2</i>  |                  |                   |       |                   | Combined                |                |                   |
|--------------------------------|---------------|------------------|------------------|-------|-------------------|---------------|------------------|------------------|-------|-------------------|---------------|------------------|-------------------|-------|-------------------|-------------------------|----------------|-------------------|
|                                | Case Carriers | Control Carriers | OR (95%CI)       | P     | P <sub>diff</sub> | Case Carriers | Control Carriers | OR (95%CI)       | P     | P <sub>diff</sub> | Case Carriers | Control Carriers | OR (95%CI)        | P     | P <sub>diff</sub> | OR (95%CI)              | P              | P <sub>diff</sub> |
| CADD <20*                      | 230           | 82               | 1.18 (0.91-1.52) | 0.23  | 1.00              | 18            | 7                | 1.08 (0.45-2.58) | 1.00  | 0.76              | 98            | 31               | 1.33 (0.89-1.99)  | 0.20  | 0.92              | 1.21 (0.98-1.50)        | 0.077          | 0.91              |
| CADD >20*                      | 259           | 93               | 1.17 (0.92-1.49) | 0.22  |                   | 144           | 43               | 1.41 (1.00-1.98) | 0.058 |                   | 76            | 26               | 1.23 (0.78-1.92)  | 0.43  |                   | 1.23 (0.78-1.92)        | 0.43           |                   |
| PolyPhen Benign <sup>^</sup>   | 322           | 116              | 1.17 (0.94-1.45) | 0.17  | 0.99              | 76            | 26               | 1.23 (0.79-1.92) | 0.43  | 0.64              | 97            | 31               | 1.31 (0.88-1.97)  | 0.22  | 0.98              | <b>1.21 (1.01-1.44)</b> | <b>0.039</b>   | 0.74              |
| PolyPhen Damaging <sup>^</sup> | 167           | 59               | 1.19 (0.88-1.60) | 0.29  |                   | 86            | 24               | 1.51 (0.96-2.37) | 0.094 |                   | 77            | 26               | 1.24 (0.80-1.94)  | 0.39  |                   | 1.24 (0.80-1.94)        | 0.39           |                   |
| SIFT Tolerated~                | 310           | 112              | 1.16 (0.94-1.45) | 0.19  | 0.96              | 72            | 21               | 1.44 (0.88-2.34) | 0.17  | 0.89              | 113           | 32               | 1.49 (1.00-2.20)  | 0.059 | 0.30              | <b>1.27 (1.06-1.52)</b> | <b>0.010</b>   | 0.71              |
| SIFT Deleterious~              | 179           | 63               | 1.19 (0.89-1.59) | 0.26  |                   | 90            | 29               | 1.30 (0.86-1.98) | 0.25  |                   | 61            | 25               | 1.02 (0.64-1.63)  | 1.00  |                   | 1.02 (0.64-1.63)        | 1.00           |                   |
| AlignGVGD <35 <sup>^</sup>     | 400           | 142              | 1.19 (0.98-1.44) | 0.092 | 0.94              | 107           | 37               | 1.21 (0.83-1.77) | 0.35  | 0.38              | 163           | 53               | 1.29 (0.95-1.77)  | 0.12  | 0.77              | <b>1.22 (1.05-1.42)</b> | <b>0.011</b>   | 0.76              |
| AlignGVGD ≥35 <sup>^</sup>     | 89            | 33               | 1.13 (0.76-1.69) | 0.61  |                   | 55            | 13               | 1.78 (0.97-3.26) | 0.79  |                   | 11            | 4                | 1.15 (0.37-3.62)  | 1.00  |                   | 1.15 (0.37-3.62)        | 1.00           |                   |
| <b>C0</b>                      | 349           | 122              | 1.21 (0.82-2.81) | 0.23  |                   | 65            | 20               | 1.36 (0.83-2.25) | 0.27  |                   | 147           | 45               | 1.37 (0.98-1.92)  | 0.074 |                   | <b>1.27 (1.07-1.50)</b> | <b>6.1E-03</b> |                   |
| <b>C15</b>                     | 29            | 10               | 1.22 (0.49-2.50) | 0.72  |                   | 25            | 7                | 1.50 (0.65-3.47) | 0.45  |                   | 14            | 6                | 0.98 (0.38-2.55)  | 1.0   |                   | 1.24 (0.77-1.99)        | 0.44           |                   |
| <b>C25</b>                     | 22            | 10               | 0.92 (0.44-1.95) | 0.99  |                   | 17            | 10               | 0.71 (0.33-1.56) | 0.52  |                   | 2             | 2                | 0.42 (0.06-2.98)  | 0.59  |                   | 0.78 (0.46-1.31)        | 0.42           |                   |
| <b>C35</b>                     | 17            | 12               | 0.59 (0.28-1.24) | 0.23  |                   | 10            | 1                | 4.20 (0.54-32.8) | 0.19  |                   | 0             | 1                | NA                | NA    |                   | 0.81 (0.42-1.54)        | 0.63           |                   |
| <b>C45</b>                     | 12            | 2                | 2.52 (0.56-11.3) | 0.26  |                   | 1             | 1                | 0.42 (0.03-6.70) | 1.0   |                   | 0             | 0                | NA                | NA    |                   | 1.82 (0.52-6.38)        | 0.42           |                   |
| <b>C55</b>                     | 13            | 6                | 0.91 (0.25-2.39) | 1.0   |                   | 4             | 1                | 1.68 (0.19-15.0) | 1.0   |                   | 6             | 2                | 1.26 (0.25-6.24)  | 1.0   |                   | 1.07 (0.50-2.32)        | 1.0            |                   |
| <b>C65</b>                     | 47            | 13               | 1.52 (0.82-2.81) | 0.23  |                   | 40            | 10               | 1.68 (0.84-3.36) | 0.18  |                   | 5             | 1                | 2.10 (0.24-17.95) | 0.68  |                   | <b>1.61 (1.03-2.53)</b> | <b>0.046</b>   |                   |

\*Variants with a PHRED-scaled CADD score ≥20 are predicted to be more deleterious than 99% of theoretical substitutions genome-wide (Reference 21)

<sup>^</sup>PolyPhen2 prediction of "probably damaging" or "possibly damaging" (PolyPhen2 Score >0.5) (Reference 22)

~SIFT prediction of "damaging" (SIFT score <0.05) (Reference 23)

<sup>^</sup>Variants with AlignGVGD score ≥35 are predicted to confer an OR >2.0 (Reference 24)
