# Supplementary material for: Rare, protein-truncating variants in ATM, CHEK2 and PALB2, but not XRCC2, are associated with increased breast cancer risks
Source: PubMed Central journal article supplement (PMC5740532; doi:10.1136/jmedgenet-2017-104588), 2017-08-04

Figure S1

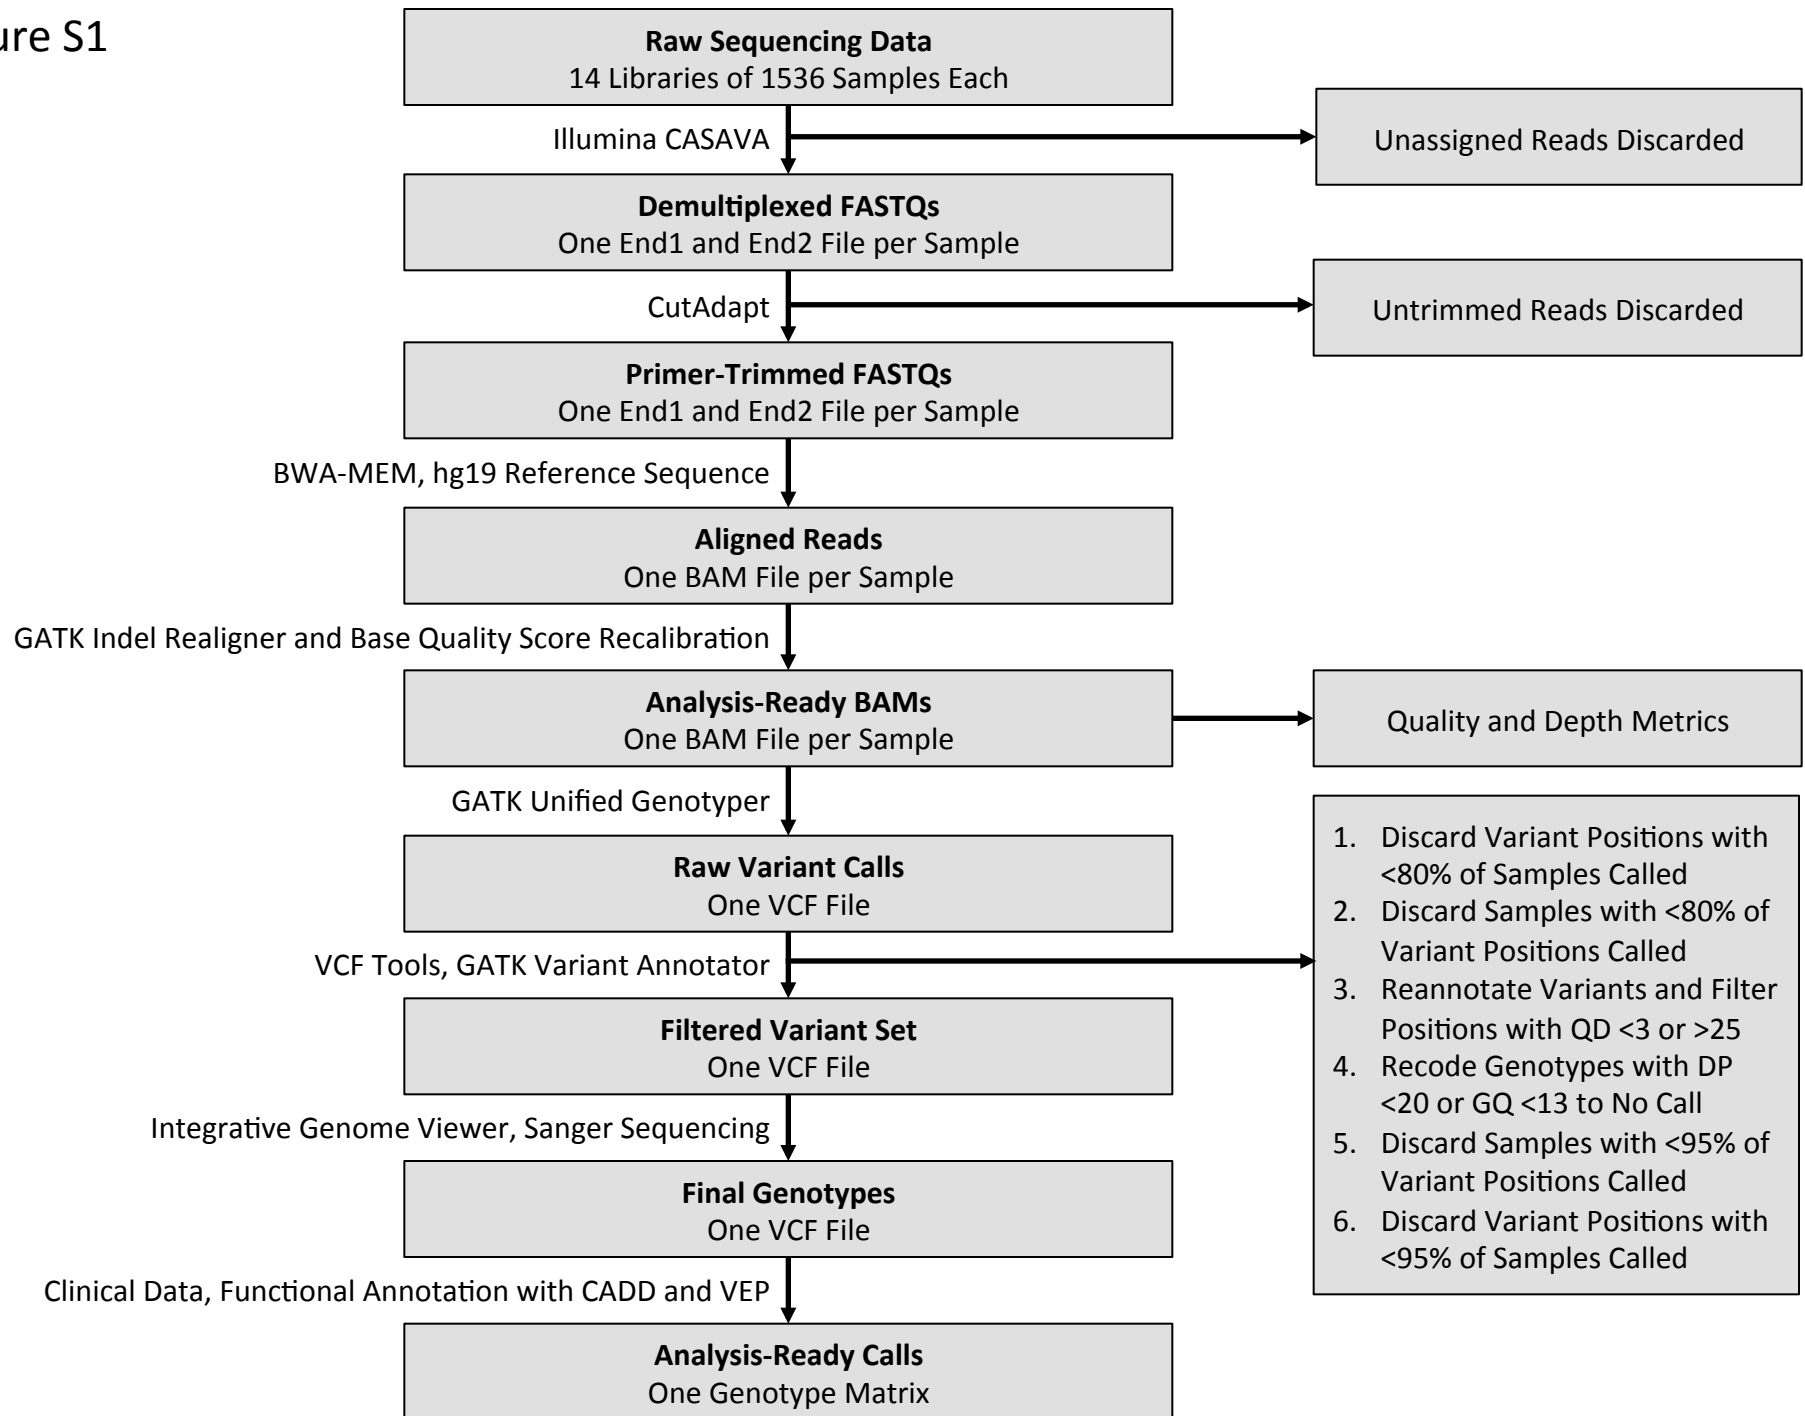

Supplement: jmedgenet-2017-104588supp009.pdf [file jmedgenet-2017-104588supp009.pdf]
