# Supplementary material for: Rare, protein-truncating variants in ATM, CHEK2 and PALB2, but not XRCC2, are associated with increased breast cancer risks
Source: PubMed Central journal article supplement (PMC5740532; doi:10.1136/jmedgenet-2017-104588), 2017-08-04

Figure S2A

### ATM Per-Base Coverage

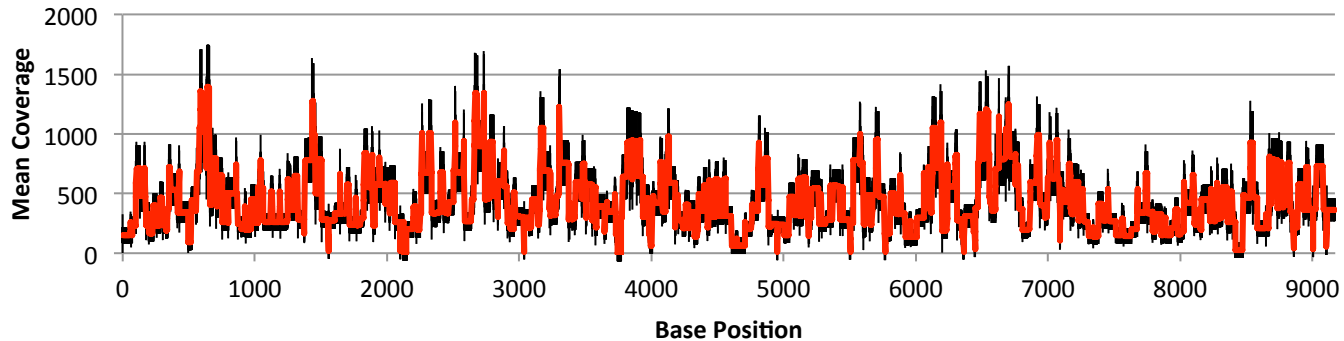

### CHEK2 Per-Base Coverage

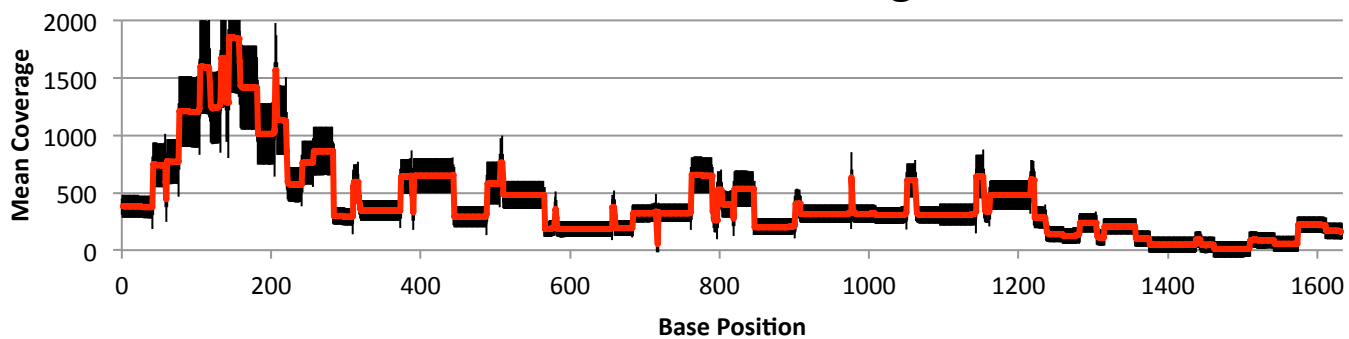

### PALB2 Per-Base Coverage

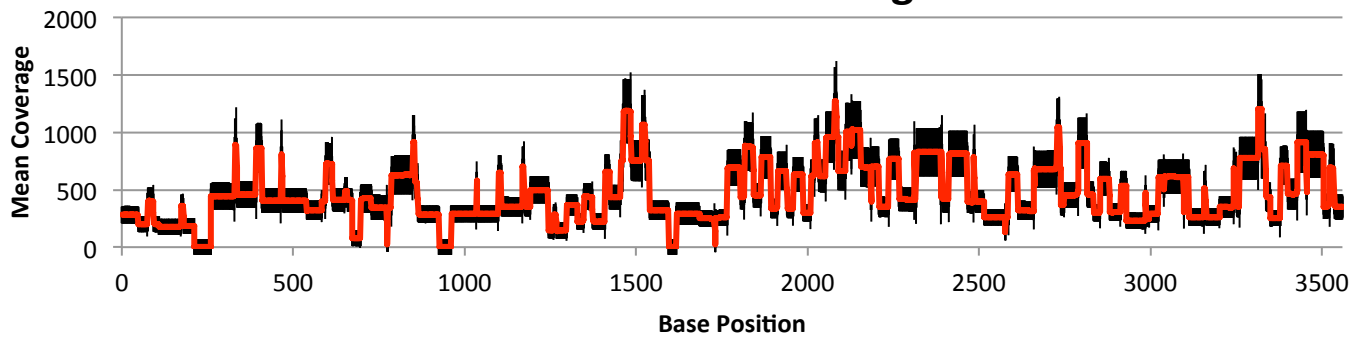

### XRCC2 Per-Base Coverage

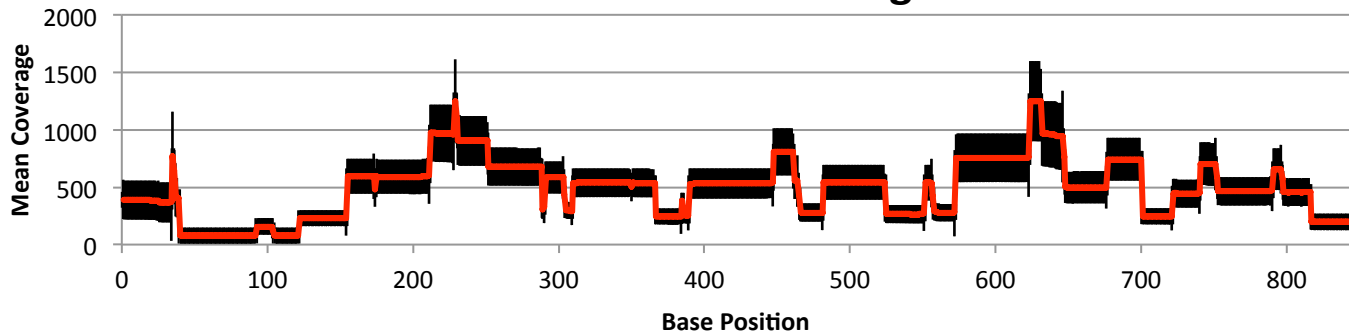

Figure S2B

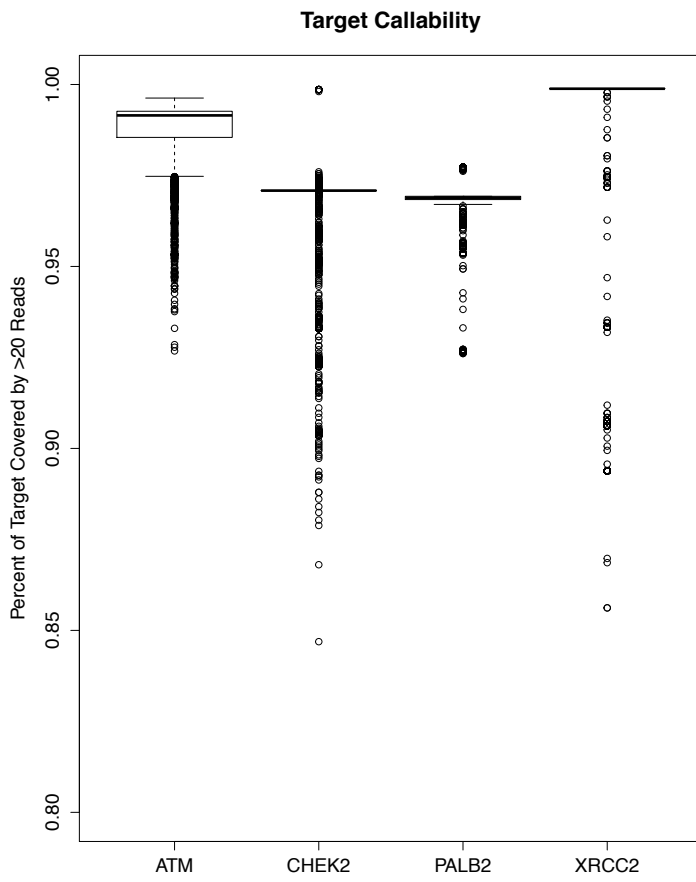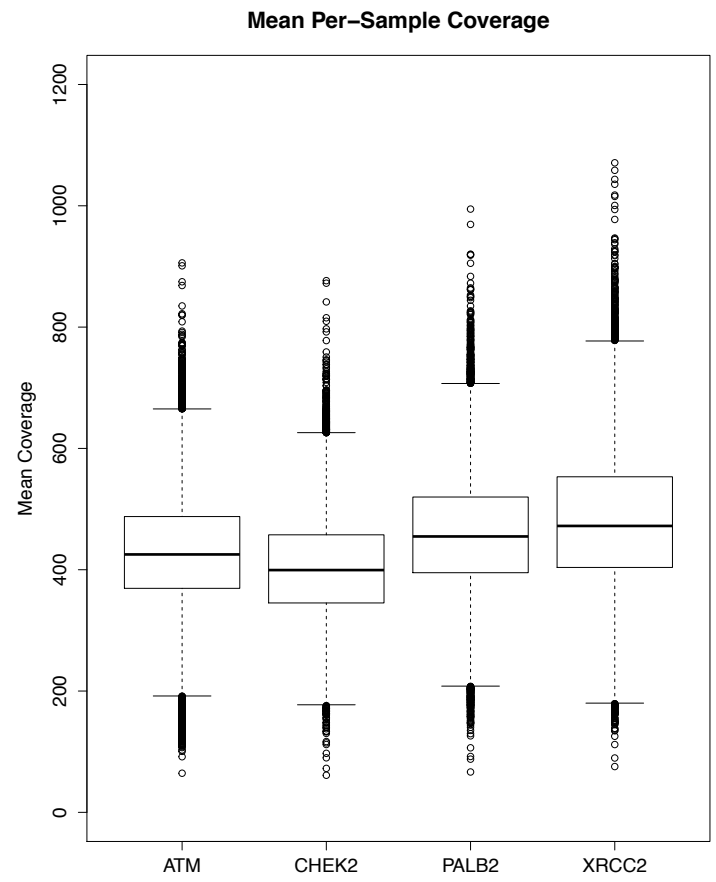

Supplement: jmedgenet-2017-104588supp010.pdf [file jmedgenet-2017-104588supp010.pdf]
